## **Dynamic contrast enhancement and flexible odor codes**

Srinath Nizampatnam\*, Debajit Saha\*, Rishabh Chandak\*, Baranidharan Raman#  
Department of Biomedical Engineering, Washington University in St. Louis

\* These authors contributed equally to this manuscript

#Corresponding author. Tel: 1-314-935-8538 Fax- 1-314-935-7448 Email: barani@wustl.edu

### **ABSTRACT**

**Sensory stimuli evoke spiking activities patterned across neurons and time that are hypothesized to encode information about their identity. Since the same stimulus can be encountered in a multitude of ways, how stable or flexible are these stimulus-evoked responses? Here, we examined this issue in the locust olfactory system. In the antennal lobe, we found that both spatial and temporal features of odor-evoked responses varied in a stimulus-history dependent manner. The response variations were not random, but allowed the antennal lobe circuit to enhance the uniqueness of the current stimulus. Nevertheless, information about the odorant identity became confounded due to this contrast-enhancement computation. Notably, a linear logical classifier (OR-of-ANDs) that can decode information distributed in flexible subsets of neurons generated predictions that matched results from our behavioral experiments. In sum, our results reveal a simple computational logic for achieving the stability vs. flexibility tradeoff in sensory coding.**

### **INTRODUCTION**

The key task of a sensory system is to transduce and represent information about environmental cues as electrical neural activities so that the organism may generate an appropriate behavioral response. The precise format in which neural activities represents stimulus specific information i.e. ‘the neural code’ has been a topic of great debate in neuroscience<sup>1-6</sup>. Both patterns of spiking activities distributed across an ensemble of neurons<sup>7-14</sup> (i.e. ‘the spatial code’), and the temporal features of these neural spike trains such as their synchronicity<sup>15,16</sup>, relative response latencies<sup>17-19</sup>, dynamics<sup>4,20-26</sup> (i.e. ‘the temporal code’) have been shown to be important for sensory coding. While stimulus-specific information exists in both spatial and temporal dimensions, what is not understood is the stability or constancy with which these neural coding schemes allow recognition of the same stimulus encountered in a variety of different ways. We examined this issue in this study.

Alternately, flexibility in sensory representation will be necessary for carrying out certain computations. Often, sensory cues encountered by an organism change dynamically, and the same sensory cue can be encountered in a variety of different contexts (for example, coffee beans in a coffee shop or in a perfume shop). Therefore, emphasizing novelty/uniqueness or suppressing/masking redundancies becomes necessary for detecting changes in the environment. Previous electrophysiological<sup>24,27-30</sup>, imaging<sup>31</sup>, and psychophysical<sup>32</sup> studies do indeed reveal such interactions exists particularly when sensory cues are dynamically encountered. Can certain aspects of the neural responses be adapted to allow the flexibility needed for adaptive computations, while at the same time maintaining stable recognition of stimulus identity?

We examined this issue in the locust olfactory system. The insect olfactory system has been widely used for studying odor coding<sup>9,14-16,22-25,33-36</sup>. In this system, an odor stimulus is detected by olfactory receptor neurons (ORNs) in the antenna and the transduced electrical signals get relayed downstream to the antennal lobe (analogous to the olfactory bulb in the

vertebrates). In the antennal lobe, cholinergic projection neurons (PNs) and GABAergic local neurons (LNs) interact to reformat the sensory input received from the ORNs. The spatiotemporal activity patterns of the PNs are thought to represent odor identity and intensity<sup>14,23,24,35,37,38</sup>. In this work, we examined how the spatial and temporal aspects of neural responses are altered when a target stimulus is delivered in several non-overlapping distractor–target odor sequences. Our results suggest a surprisingly simple neural encoding solution that provides an adequate tradeoff between the representational stability needed for robust recognition and flexibility needed for adaptive sensory computations.

## RESULTS

### PN responses vary depending on stimulus history

We began by examining how stable or variable were odor-evoked individual PN responses when the same stimulus was delivered with different stimulus histories. Variations in stimulus histories were introduced by delivering the same odorant ('target stimulus') in various distractor–target odor sequences. A 500 ms inter-stimulus interval was used to separate the two stimuli delivered. Five different odorants were used as distractor cues and two target stimuli were used in all our experiments (**Fig. 1a,b**). It is worth noting that the distractor odorants comprised of four odorants belonging to different functional groups (2octanol (2oct) – an alcohol, isoamyl acetate (iaa) – an ester, benzaldehyde (bzald) – an aldehyde, citral – a terpene), and a complex blend (apple). The target odorant comprised of an odorant that has been shown previously as suitable for associative conditioning (hexanol), and an innately attractive odorant (geraniol)<sup>24</sup>.

We found that although responses of individual PNs during solitary introductions of the target stimulus were reliable across trials, they became variable when the same stimulus was delivered with different stimulus histories (**Fig. 1c,d**). When compared to the solitary target odor responses, the number of spikes increased for some stimulus histories (e.g. PN2 2oct-hex vs. PN2 hex) but reduced for others (PN2 bzald-hex vs PN2 hex). Further, note that increase/decrease in target stimulus response was not based on the chemical similarity between the two cues delivered in the sequence. Our results indicate a simple rule for cross-talk: if a PN responded strongly to the first cue in the sequence (i.e. the distractor) then its response to the second stimulus (i.e. the target) was likely to be reduced. Alternately, if the spiking activity reduced below baseline levels during exposure to the distractor cue, then its response to the following target increased in most cases (all comparison made with respect to the response evoked by the solitary target stimulus; **Supplementary Fig. 1a–d**).

Next, we examined how the variations observed at the individual PN level affected the ensemble neural representation of the target stimuli. To visualize odor-evoked population PN responses, we used a dimensionality reduction analysis. Individual PN responses were aligned with the odor onset and binned in 50 ms time windows. The spike count per time bin of each PN became a vector component, and the spike counts of all recorded PNs in that same time bin were regarded as the high-dimensional neural response. The time series of high-dimensional PN responses during the entire target stimulus presentation (4 s duration) was then projected along three principal component axes (see Methods). We found that introduction of the same stimulus generated not one ensemble neural response trajectory but a family of trajectories, one for each stimulus history. Further, consistent with the earlier studies<sup>24,34,36,38</sup>, we found that all introductions of the target stimuli generated ensemble neural trajectories that included a fast-transient response component (~1 – 1.5 s from odor onset) that subsequently stabilized into steady state responses. Notably, the direction of the high-dimensional vectors (indicates variation in the set of PNs activated), and the direction of their evolution (variation in spatiotemporal patterning) during the target stimulus presentation varied in a history dependent

manner. This can be clearly noted from the misalignment between the family of neural response trajectories generated during the exposure to the same target stimulus (**Fig. 1e,f**).

How distinct or separable are these responses generated by the same stimulus? To examine this, we used a supervised dimensionality reduction technique (linear discriminant analysis or LDA) that seeks to capture the differences between the ensemble neural responses evoked by the target odorant. Projecting the data along the LDA axes, we found that the target stimulus evoked PN responses created multiple, separable clusters, one for each stimulus history with which it was presented (**Fig. 1g,h**). This qualitative observation was further quantified using a classification analysis (**Supplementary Fig. 1e,f**; see Methods). Therefore, we conclude that both at the individual and population levels, PN responses that are thought to mediate identification of an olfactory stimulus in the insect olfactory system can vary significantly when the same stimulus is encountered with different histories.

### **Stimulus-history dependent contrast enhancement**

Are these variations in odor-evoked ensemble neural responses random? To examine this issue, we compared the neural responses evoked by solitary and sequential presentations of the target stimulus with the distractor cue (**Fig. 2a,b**). Our results indicate each olfactory stimulus evoked a closed-loop trajectory that evolved in a unique direction. As can be expected from our earlier analysis, the solitary and the sequential introductions of the same target stimulus generated two different neural response trajectories. As a rule, compared to the solitary target stimulus response, when presented following the distractor cue, the ensemble response trajectory shifted further away from the responses evoked by the distractor cue. This is consistent with individual and ensemble PN response analyses (**Fig. 1c,d** and **Supplementary Fig. 2**) where we found that during sequential presentations of the target stimulus, common neurons were suppressed (i.e. responds to both target and the preceding distractor stimulus), whereas those that responded uniquely to the target odorant tended to increase.

As a direct consequence, the angular separation between neural response trajectories between the target and distractor cues increased, which can be expected to enhance discriminability between these two odorants. To quantify this, we used a correlation analysis where we compared the similarity between ensemble PN activities evoked by the target stimulus and the distractor cue. We made this comparison for both the solitary exposure of the target stimulus and the sequential presentations (**Fig. 2c,d**). As can be noted, the correlation between the distractor cue and the target stimulus significantly reduced during sequential presentation of the target stimulus. Hence, our results indicate that alterations in the ensemble neural responses allow the antennal lobe circuit to enhance the uniqueness of the target stimulus with respect to the preceding cue i.e. dynamic, history-dependent contrast enhancement.

### **Same stimulus can activate varying combinations of neurons**

To enhance contrast with different distractor odorants, the same target stimulus must activate a different subset of the PNs. So, we wondered if there exists a unique set of neurons that is activated during all the target stimulus presentations to allow stable recognition. To understand this, we classified the PN responses into 'responsive' or 'non-responsive' categories (see Methods). We found that the percentage of neurons activated and the composition of the set of responding neurons varied when the same target stimulus was presented with different histories (**Fig. 3a,b**). Further, the percentage of PNs that consistently responded to all introductions of hexanol and geraniol (the two target stimuli) was a smaller fraction of the set that responded to the solitary introductions of these two target stimuli.

To represent the identity of the target stimulus, the set of neurons must be consistent as well as unique. So, we examined how many of these consistent neurons were also unique responders i.e. respond to target stimuli alone (**Fig. 3c,d**). Surprisingly, we found that there was

not a single PN that responded uniquely and consistently to hexanol in all the conditions. Only 2% neurons responded uniquely and consistently to geraniol presented with different stimulus histories. Therefore, our results indicate that combinatorial code involving a consistent and unique set of neurons may not be a suitable approach for achieving stable recognition of a sensory stimulus encountered with varying stimulus histories.

### **Temporal response features also vary with stimulus history**

How robust are temporal features such as response latency and pattern of stimulus-evoked spike trains in allowing stable odor recognition? To examine this, we defined the response latency as the first time bin when a neuron's response exceeded a certain threshold value (see Methods; **Supplementary Fig. 3a,b**). We then classified neurons as early responders (latency < 600 ms) or late/non-responders (latency > 600 ms). Note that the early responders were PNs that responded before behavioral response onset (median ~600 ms<sup>24,35</sup>). For visualization, we represented this classification of the response latency across the ensemble of PNs as a color bar (**Fig. 4a,b**). The response latency vector was generated for different introductions of the target stimulus and shown as a color bar to allow comparisons. Our results indicate that depending on the stimulus history, some of the early responding projection neurons to the solitary presentations of the target stimulus became late/non-responsive in the sequential presentations, while some of the late/non-responders became early-responders. Furthermore, only a small subset of neurons consistently responded early to the target stimuli. Similar to the combinations of PNs activated (**Fig. 3**), the sets of consistent early responders that were also unique responders to the target stimuli were empty or near empty sets (**Fig. 4c,d**).

How robust are other features of PN responses such as the pattern of their stimulus-evoked spike trains? To examine this, we considered the evolution of trial-averaged PN spike counts over time (during the four second of target stimulus presentation) as the temporal response vector. We computed the correlation between the PN temporal response vectors generated by the same target stimulus presented with different stimulus histories (**Supplementary Fig. 3c,d**). The distribution of this temporal pattern similarity metric for each target-history combination revealed that more correlation values were closer to a value of 'zero' rather than 'one' (**Fig. 4e,f**). This indicated that the temporal patterns of PN spiking activities also change considerably with stimulus history.

Taken together, these results indicate that temporal features of PN responses are also highly variable and may not allow robust recognition of a stimulus when it is encountered with different stimulus histories.

### **Robust behavioral recognition**

Our electrophysiological results indicated that combinations of neurons and their temporal response features changed when the same stimulus was presented with different histories. Therefore, we wondered if locusts can behaviorally recognize a conditioned stimulus if it is presented in a similar fashion. To determine this, we trained locusts using an appetitive-conditioning paradigm. Briefly, during the training phase, starved locusts were presented a conditioned stimulus (hexanol; also target stimulus in electrophysiology experiments) followed by a food reward (wheat grass) with significant stimulus-reward overlap (see Methods). Six such training trials were sufficient for the locusts to learn the association between the olfactory cue and the reward. In an unrewarded test phase, locusts that learned this association between the stimulus and reward opened their sensory appendages close to their mouths called maxillary palps in anticipation of the reward. The distance between the palps was tracked using a custom-written software and used as a metric for successful recognition (see Methods). Notably, responses of the trained locusts to the conditioned stimulus were consistent even when the same stimulus was presented multiple times without reward during the test phase. Therefore,

we assayed the palp-opening responses of the trained locusts to the conditioned stimulus presented with varying stimulus histories (**Fig. 5a–f**).

We observed that trained locusts responded to the conditioned stimulus (hexanol) irrespective of whether it was presented solitarily or in a sequence following a distractor cue (**Fig. 5g**; see Methods). While three of the five distractor cues did not elicit a palp-opening response (POR), two odorants (2oct and iaa) evoked POR responses that were weaker than those observed during solitary presentations of the conditioned stimulus (**Fig. 5h, Fig. 5b–f**). In some cases, POR response to the distractor diminished the response magnitude to the conditioned stimulus (**Fig. 5c**; iaa-hex). Even when the distractor did not elicit a POR response, we found that the response magnitude to the conditioned stimulus can be reduced (**Fig. 5f**; app-hex). Although the POR magnitude varied, the trained locusts responded with an above baseline-level response to almost all presentations of the conditioned stimulus. Based on these observations, we conclude that although there is some interference from the distractor cues, locusts can robustly recognize the conditioned stimulus presented with varying stimulus histories.

### Decoding with optimal linear classifiers

Can the behavioral responses to distractor-conditioned stimulus sequences be predicted from the ensemble PN neural activities? To understand this, we first sought to determine whether the target can be robustly recognized in a distractor-target sequence (i.e. pairwise odor classification). For this approach, we constructed a linear contrast-enhancement kernel based on the solitary responses evoked by the distractor and target odorants (**Supplementary Fig. 4a–c**). Ensemble PN activities in 50 ms time bins were convolved with this kernel and input to a perceptron-like classifier with fixed weights (see Methods) for classification into target odor ‘present’ or ‘absent’ categories. The bin-by-bin, trial-by-trial classification results were then converted into probabilities of robust target odor recognition and plotted as a function of time (**Supplementary Fig. 4d**). This approach was largely successful in recognizing the target odorants in a given distractor-target odor sequence. However, there were two main drawbacks in this approach: (i) the response to each distractor and target stimulus need to be known to construct the contrast enhancement kernel and to set the classifier threshold, and (ii) the number of free parameters involved is extremely large (for a dataset with ‘ $n$ ’ neurons:  $n \times (n-1)/2$  kernel parameters + 1 classifier threshold parameter needed). Nevertheless, this result indicated that PN ensemble neural activities encoded the information needed to robustly recognize a target odorant in each of the five distract-target sequences.

As a final approach, we used a linear optimal classifier (linear support vector machine<sup>11,39</sup>) to separate the target odorants from all five distractor stimuli (**Fig. 6a**). Surprisingly, we found that this was indeed feasible and the target stimuli can be robustly discriminated and recognized (**Fig. 6b**). While this approach used a lot fewer parameters (for ‘ $n$ ’ neurons this approach would require ‘ $n+1$ ’ free parameters;  $n$  for the weight vector  $v_{svm}$  and 1 threshold parameter), it still requires that the PN responses to target odor and all the distractor odorants be known to determine the right set of parameters. Furthermore, even though the classification results show that robust recognition of the target stimulus is feasible from the ensemble PN activities, it still does not match well with the behavioral POR observed for these stimuli. Particularly, it is worth noting that none of the approaches generated false positives for 2oct and iaa.

### Flexible neural decoder: OR-of-ANDs

We sought to determine the simplest approach to transform ensemble PN responses into behavioral PORs. To design this decoder, we exploited the observation that for pairs of target stimulus presentations with varying histories there was a substantial overlap in the set of neurons activated (**Fig. 3a**). This was used to design a pairwise odor classifier that robustly

recognized the target stimulus in each distractor-target sequence (**Supplementary Fig. 4d**). However, when all stimulus histories were considered simultaneously, the set of consistent and unique PNs reduced significantly. Therefore, we reasoned that a decoder capable of exploiting information distributed in a flexible subset of neurons would allow robust recognition of the target stimulus.

To design the flexible classifier, we summed the contributions of all neurons activated by solitary introductions of the target stimulus and disregarded the contributions of all other projection neurons (i.e. weight of '1' for each neuron activated by solitary introductions of the target stimulus, and '0' for all others). Next, the classification threshold ( $m$ ) was set to a value less than the number of neurons ( $n$ ) assigned a weight of '1' (i.e.  $m < n$ ). It is worth to note that the classifier becomes analogous to an OR-of-ANDs logical operation:  $m-1$  ANDs and  $n$  choose  $m$  ORs (or combinations) can generate an output of 'target present' from the classifier (**Fig. 6c**). Any  $m$ -out-of- $n$  neurons that respond to the solitary introductions of the target stimulus are sufficient for robust recognition of the target stimulus. Also, note that the composition of the  $m$  neurons is allowed to vary across stimulus histories under this scheme.

We examined performance of both analog (PN firing rates were retained) or digital (binarized into 'responsive' and 'non-responsive') versions of this linear classifier (**Fig. 6d** – analog classifier, **Supplementary Fig. 5** – digital classifier). In both cases, the classification results from the OR-of-AND classifier revealed robust recognition of all presentations of the target stimulus. Interestingly, misclassifications were made for 2oct, iaa, and apple. It is worth noting that both 2oct and iaa evoked POR in locusts trained for recognizing hexanol. However, any further manipulation of classifier's free parameter (i.e. threshold or value of  $m$ ) to reduce misclassification for apple, resulted in overall recognition performance degradation.

An earlier work showed that following termination of an odor pulse, a nearly non-overlapping set of neurons are activated (OFF ensemble neural response)<sup>25</sup>. These odor-evoked OFF responses are stimulus-specific. More importantly, a pattern-match with the ON neurons allowed prediction of palp-opening response and a pattern-match with the OFF neurons were better indicators of palp-closing. Therefore, we modified the decoding scheme to include two OR-of-AND classifiers, one for monitoring similarity with the set of hex-ON neurons, and the second to track the similarity with the set of hex-OFF neurons (**Fig. 7a,b**). Our results indicate that the performance of this ON-OFF flexible decoder (**Fig. 7c-i**) was comparable to the ON response model except for one important difference. We found that unlike 2oct and iaa, distractor cues that evoked POR, apple alone activated comparable pattern-matches with both hex-ON and hex-OFF neurons. When the classifier outputs were transformed into behavioral responses (**Fig. 7i**), these contributions cancelled each other out (palp-opening vs. palp-closing). Therefore, the ON-OFF flexible decoder predicted mean POR trends that tightly matched with those observed in our behavioral experiments for all distractor-target odor sequences.

In sum, we conclude that a decoding scheme based on flexible combinations of neurons would allow stable recognition of an odorant while allowing the antennal lobe circuits to adapt their ensemble responses in a stimulus-history dependent manner.

## DISCUSSION

What is the neural code for a sensory stimulus is a fundamental question in sensory neuroscience. Several encoding schemes that depend on a unique set of neurons activated ('the combinatorial or spatial code'), or the temporal features of neural electric discharges ('the temporal code'), or their combination ('spatiotemporal schemes') have been proposed for representing stimulus-specific information in sensory circuits. While it is well established that stimulus-specific information can indeed exist in both spatial and temporal dimensions, how robust are these schemes to extrinsic (for example, stimulus history<sup>27,35</sup> or ambient conditions<sup>40</sup>),

or intrinsic (for example, plasticity<sup>41</sup> or internal-state such as hungry vs. satiated<sup>42</sup>) perturbations? This is what we sought to determine in this study.

We examined the stability of neural representations to odorants when only the stimulus history was systematically varied. Surprisingly, this manipulation was enough to induce variations in spatial, temporal and spatiotemporal features of neural responses elicited by an odorant. Nevertheless, locusts trained to recognize a conditioned stimulus could robustly recognize and respond to the same. This mismatch between the lack of stability in the neural representation and robustness in behavior necessitated a re-examination of potential mapping schemes between neural inputs and behavioral outputs. Notably, our results indicate that a linear scheme that decodes information from flexible subsets of neurons was sufficient to achieve this transformation.

The flexible decoding approach can be easily understood if the problem is recast as one of object recognition (**Supplementary Fig. 6**). A simple approach to recognize an object, say a 'chair', is to first segment it into simple features (such as 4 legs, seat, back rest, and hand rest). While the presence of all relevant features (all four features in this example) allows robust recognition of the prototype chair, it may not allow generalization when other instantiations of this object are presented. Therefore, to allow generalization, it would be necessary to relax the constraint that all the relevant features need to be present. Instead, determining the presence or absence of a meaningful subset of these features, any  $m$  features out of the possible  $n$  features ( $m < n$ ), can be used for achieving robustness. Higher values of  $m$  allow more specificity, whereas lower values allow generalization. Our results indicate that such a decoding approach can indeed allow robust recognition of odorants presented with different stimulus histories (note that odor identity is analogous to the object to be recognized, and activation of a projection neuron is analogous to the presence of a feature). While results presented used weight vectors with components that were either a 0 or 1, we found further improvements in classification results could be achieved by using negative weights for non-responsive neurons (not shown).

Could such a flexible decoding scheme be implemented by the insect olfactory system? To understand this issue, it would be necessary to identify the basic components of the decoder: (i) convergence of input from multiple PNs onto downstream neurons, (ii) linear combination of the inputs, and (iii) a detection threshold that does not require all input neurons to be simultaneously co-active. Existing anatomical and functional studies have shown that downstream Kenyon cells in the mushroom body linearly combine inputs from multiple projection neurons<sup>43,44</sup>. Further photostimulation of Kenyon cell dendritic claws in fruit flies have revealed that activating more than half of these input regions is sufficient for driving these cells to spike<sup>45</sup> (i.e.  $n/2 < m < n$  is sufficient). Therefore, anatomical and functional evidences suggest that the downstream centers in the mushroom body can indeed implement such a decoding approach.

Our results also indicate that variations in the neural responses with stimulus history were not random. Rather, the response evoked by the current stimulus was reshaped to suppress any overlap with the preceding cue and increase the responses of those PNs that responded uniquely to the current cue. This simple manipulation at the level of individual PNs resulted in contrast enhancement of population neural responses. Note that contrast enhancement in olfaction happens between stimuli over time, rather than in the spatial domain as in vision.

Can such dynamic contrast enhancement lead to other potential confounds? For example, how are PN responses altered when back-to-back pulses of the same odorant are presented? To determine this, we reanalyzed a recently published PN response dataset to two back-to-back pulses of hexanol (**Supplementary Fig. 7**). Our analysis revealed that in addition to reduction in responses to the subsequent pulses<sup>36</sup>, a few PNs that did not respond to the first pulse were activated in the second pulse, and some responding to the first pulse were inactivated. Note that the same OR-of-ANDs classifier can robustly recognize the stimulus after this subtle response perturbation.

While our results do not provide mechanistic insights on how this adaptive computing may arise, a few candidate mechanisms can easily be identified. Activity-dependent synaptic depression between the sensory neurons and projections neurons<sup>46,47</sup>, interference due to stimulus-evoked OFF responses<sup>25</sup> or adaptation at the level of sensory neurons<sup>48,49</sup> can all contribute to the results observed in this study. Lastly, while we perturbed odor-evoked neural responses using variations in stimulus histories, other factors such as ambient conditions (humidity, temperature, air flow), presence of competing odorants, plasticity in central circuits have all been shown to introduce variations different from those that were examined here. Whether the same flexible decoding scheme proposed here can provide a generic framework for achieving tradeoff between stability and flexibility remains to be determined.

## **ACKNOWLEDGMENTS**

We thank Dirk Albrecht (Worcester Polytechnic Institute), Shinung Ching, Keith Hengen and members of the Raman Lab (Washington University in St. Louis), and Nitin Gupta (Indian Institute of Technology, Kanpur) for feedback on the manuscript. This research was supported by an Office of Naval Research grant (N00014-16-1-2426) and an NSF CAREER grant (#1453022) to B.R.

## **AUTHOR CONTRIBUTIONS**

B.R. conceived the study and designed the experiments/analyses. S.N. did all the analyses, generated all the figures and wrote the first draft of the manuscript. D.S. performed the electrophysiological recordings. R.C. did the behavioral experiments. B.R. revised the paper taking inputs from all the authors. S.N., D.S., and R.C. are equally contributing first authors.



## FIGURE CAPTIONS:

### Figure 1: Projection neuron responses vary in a stimulus-history dependent manner

**(a, b)** Distractor-target sequences used in this study are shown. A target stimulus (hexanol – hex or geraniol – ger) was presented solitarily or in a non-overlapping sequence with a distractor cue. All target and distractor stimuli were presented for 4 s. The time interval between the termination of the distractor stimuli and the onset of the target stimulus was 500 ms (Inter-stimulus interval or ISI).

**(c)** Spiking responses of two different projection neurons (PNs) in the locust antennal lobe are shown. Each tick mark represents an action potential or ‘spike’ fired by the PN. Each row corresponds to one trial and PN responses in ten consecutive trials are shown for assessing the repeatability of observed spiking response patterns. The duration when the distractor (blue) and target (red) stimuli were puffed onto the locust antenna are shown using colored boxes. As can be noted, the target stimulus (hex) can be presented solitarily (top panel) or following one of the five different distractor cues: history 1 – 2octanol (2oct), history 2 – isoamyl acetate (iaa), history 3 – benzaldehyde (bzald), history 4 – citral (cit) and history 5 – apple (app).

**(d)** Similar plots as in **panel c** but showing responses of two more PNs to presentations of geraniol (ger) with different stimulus histories.

**(e)** Responses of eighty-five PNs projected onto the first three principal components are shown. Each spoke represents the ensemble neural activities in a 50 ms time bin after PCA dimensionality reduction. Arrows indicate direction of evolution of the stimulus-evoked responses over time. The six trajectories shown correspond to PN responses observed following the introductions of the target stimulus either solitarily or in one of five stimulus sequences.

**(f)** Similar trajectory plots as in **panel e** but visualizing ensemble PN responses evoked by introductions of geraniol (ger) with different stimulus histories.

**(g)** Population PN responses are shown after linear discriminant analysis dimensionality reduction ( $n = 85$  PNs). Each 3D-sphere represents an eighty-five-dimensional PN activity vector in a 50 ms time bin. Eighty data points corresponding to ensemble neural activities evoked during 4 s of hexanol exposure with a particular stimulus history are assigned the same color.

**(h)** Similar plot as in **panel g** but showing responses elicited during geraniol exposures. Different colors are used to differentiate responses evoked by geraniol presented solitarily or in one of the five odor sequences.

### Figure 2: Dynamic contrast enhancement of odor-evoked ensemble responses

**(a)** Similar trajectory plots as shown in **Fig. 1e** but comparing the population PN responses generated during solitary presentations of the distractor odorant (blue trajectory) and target odorant (red trajectory) with responses elicited by the same target odorant presented after the termination of the distractor cue (orange trajectory). Five plots are shown corresponding to hexanol introductions in the same five stimulus sequences shown in **Fig. 1a,c**. Note that compared to the red trajectories, the orange trajectories are more distant from the blue trajectories in every panel.

**(b)** Similar plots as in **panel a** are shown for five sequential presentations of geraniol. It is worth noting again that compared to the solitary geraniol responses (purple trajectories), the responses observed during sequential presentations (pink trajectories) are more distant from the distractor cue evoked responses (blue trajectories) in every panel.

**(c)** The mean of correlation values between the ensemble PN responses ( $n = 85$  PNs) evoked by hexanol and the five distractor cues are shown as bar plots. Error bars indicate  $\pm$  s.d across ten trials. The mean odor-evoked responses during the initial 1 s after stimulus introduction was used for computing these correlations. Red bars quantify similarities between solitary distractor cue and solitary hexanol presentations. Orange bars indicate similarities between the solitary distractor cue and sequential hexanol presentations. Asterisks indicate a significant decrease in the correlation ( $*P < 0.05$ , NS:  $P > 0.05$ , paired t-tests,  $n = 10$  trials).

**(d)** Similar plots as in **panel c** but geraniol is used as the target odorant.

### Figure 3: Evaluating the stability of the combinatorial code

**(a)** Each projection neuron was classified as being ‘responsive’ or ‘non-responsive’ to the target stimulus (see Methods) and the classification of all eighty-five neurons are shown as a barcode. This binary classification was done for solitary and sequential introductions of hexanol. Note that all barcoded PNs are identically sorted and displayed to facilitate comparison. The percentage of PNs classified as being responsive during each hexanol presentation is shown above the barcode. The set of PNs classified as being responsive for all hexanol introductions is identified as the ‘consistent set’ and is also shown as rightmost barcode.

**(b)** Similar plot as in **panel a** but comparing geraniol responsive and non-responsive set of PNs is shown.

**(c)** Barcodes identifying responsive and non-responsive PNs for the five different distractor stimuli are shown. These PNs were removed from the set of neurons activated during all introductions of hexanol i.e. ‘the consistent set’, to identify those PNs that were both consistent and unique responders to hexanol (the rightmost barcode). As can be noted, this is an empty set for hexanol.

**(d)** Similar plot as in **panel c** but identifying the unique and consistent set of PNs that responded to geraniol. For geraniol, this set consisted of only 2% of the PNs.

### Figure 4: Temporal response features vary with stimulus histories

**(a)** Firing rates of eighty-five neurons during the 2 s following hexanol introductions are shown. A log scale was used to allow comparison between different PNs. Firing rates in 50 ms time bins were averaged across trials and are shown as a function of time. Note that the PNs were sorted based on their response latency to solitary hexanol introductions with early responders at the top and late/non-responders at the bottom. The color bars next to the firing rate plots reveal the response latency category of each PN: early responders in white and late/non-responders in black. Firing rates of the PN ensemble and the response latency vector are shown for solitary and sequential introductions of hexanol.

**(b)** Similar plots as in **panel a** but now showing PN responses and their latencies to solitary and sequential introductions of geraniol.

- (c) Same analysis as in **Fig. 3c,d**. Barcodes identifying the set of PNs that responded consistently early during solitary and sequential hexanol introductions is identified. The early responsive and late/non-responsive PNs for the five different distractor stimuli are also shown. The set of PNs that were both consistent and unique early responders to hexanol is identified (the rightmost barcode). As can be noted, this is an empty set for hexanol.
- (d) Similar plot as in **panel c** but identifying the unique and consistent set of PNs that responded early to geraniol. For geraniol, this set consisted of only 1.2% of the PNs.
- (e) Distributions of correlation values between PN spike trains for each sequential introduction of hexanol with solitary hexanol responses are shown.
- (f) Similar plots as in **panel e** but analyzing PN responses to solitary and sequential introductions of geraniol.

### Figure 5: Robust behavioral response to a conditioned stimulus

- (a) Locusts were trained to associate an odorant with a food reward. Trained locusts subsequently responded the conditioned stimulus presentations by opening their sensory appendages close to their mouths called maxillary palps. The distance between the palps was tracked and plotted as a function of time. Mean palp-opening response of locusts trained to recognize hexanol (conditioned stimulus) is shown. Error bar represents standard error across locusts ( $n = 27$ ).
- (b–f) Palp opening responses to five different sequential presentations of hexanol (i.e. the conditioned stimulus) are shown. Note that these stimulus sequences are identical to the ones used in our physiology experiments.
- (g) PORs of each locust to hexanol were classified as responsive and non-responsive and shown for solitarily and each sequential presentations of the conditioned stimulus.
- (h) PORs of each locust to the five distractor odorants: 2oct, iaa, bzald, cit, and app are shown.

### Figure 6: Linear neural decoding of ensemble neural activities

- (a) A schematic of the multi-class linear support vector machine (SVM) classifier is shown. Here again the input to the classifier was an eighty-five-dimensional ensemble PN activity vector in a 50 ms time bin ( $x(t)$ ). The optimal weight vector that separates hexanol responses for all other odor-evoked and baseline activities was determined and is shown as a color bar ( $v_{svm}$ ). Contribution of each PN was weighted based on the corresponding weight-vector component ( $v_{svm}^T x(t)$ ) and thresholded to produce a binary classification output: hexanol '*present*' or '*absent*'. Bin-by-bin classifier output and the probability of hexanol recognition was plotted as in **Supplementary Fig. 4**. Note that the number of parameters here are 86 (number of neurons and threshold)
- (b) Left panel, bin-by-bin, trial-by-trial classification results are shown for the five sequential introductions of hexanol. As noted before, each red tick mark indicates that the hex was recognized as being present in that time bin. Right panel, the probabilities of hex classification using the linear SVM classifier, across trials are plotted as a function of time for different hexanol presentations.

(c) A schematic of the flexible set decoder is shown. Ensemble PN activity vector in a 50 ms time bin ( $x(t)$ ) was the input to the classifier. The weight vector  $v$  had the same number of components as  $x(t)$ . A vector component of '1' was assigned corresponding to PNs that were responsive to the solitary hexanol introductions, and '0' was assigned corresponding to non-responsive PNs. A dot product of  $x(t)$  and  $v$  resulted in summation of all hexanol responsive PNs. This scalar value was subsequently thresholded to determine the classifier output. The threshold to be exceeded was set to allow flexible subsets of neurons to contribute towards reaching the cutoff value. A digital version of the classifier when input vector  $x(t)$  was also binarized and is shown in **Supplementary Fig. 5**.

(d) Classification results for the flexible set decoder are shown as a bin-by-bin, trial-by-trial raster plot and as classification probabilities over time. Same convention as those in **panel b**.

### Figure 7: Predicting behavioral responses from neural activities using flexible decoding

(a) Left panel, results from two flexible set decoders using weight vectors  $V_{ON}$  and  $V_{OFF}$  are shown.  $V_{ON}$  was a binary weight vector with a vector component '1' corresponding to PNs responsive during hexanol presentation (i.e. stimulus ON epochs).  $V_{OFF}$  was also a binary weight vector but with a vector component '1' corresponding to those PNs that were activated after the termination of the hexanol presentation (i.e. stimulus OFF period – a 4s time window that began 500 ms after stimulus termination). Note that red ticks indicate the output of first flexible set classifier (using  $V_{ON}$  weight vector) indicating 'hexanol ON' during that time bin. A blue tick indicates the output of the second flexible set classifier (using  $V_{OFF}$  weight vector) indicating 'hexanol OFF' during that time bin. Right panel, the probability of hexanol ON and hexanol OFF over time are shown for the odor sequences.

(b)  $V_{ON}$  and  $V_{OFF}$  weight vectors used for generating classification results in **panel a** are shown. Vector component with a value '1' (i.e. responsive PN) are shown in white and the vector component corresponding to the non-responsive PNs is shown in black. Note that the set of PNs activated during and immediately after hexanol presentations are nearly non-overlapping.

(c) A schematic of the *ON-OFF* model for translating the classification results from the flexible set decoder using  $V_{ON}$  and  $V_{OFF}$  weight vectors into behavioral PORs. The classification probabilities (i.e. red and blue traces shown in **panel a**) were appropriately thresholded and scaled to generate the PORs. Note that pattern match with ON responses were used to generate palp-opening responses, whereas pattern match with OFF responses were used to generate palp-closing responses.

(d–i) Observed PORs to various presentations of hex (same as in **Fig. 5a–f**) are shown in black. The predicted PORs generated from the *ON-OFF* model are shown in purple. The correlation coefficient between the actual (mean trend; i.e. the black trace) and predicted PORs are shown on each of the six panels. The model parameters were set based on PORs to solitary hexanol presentation.

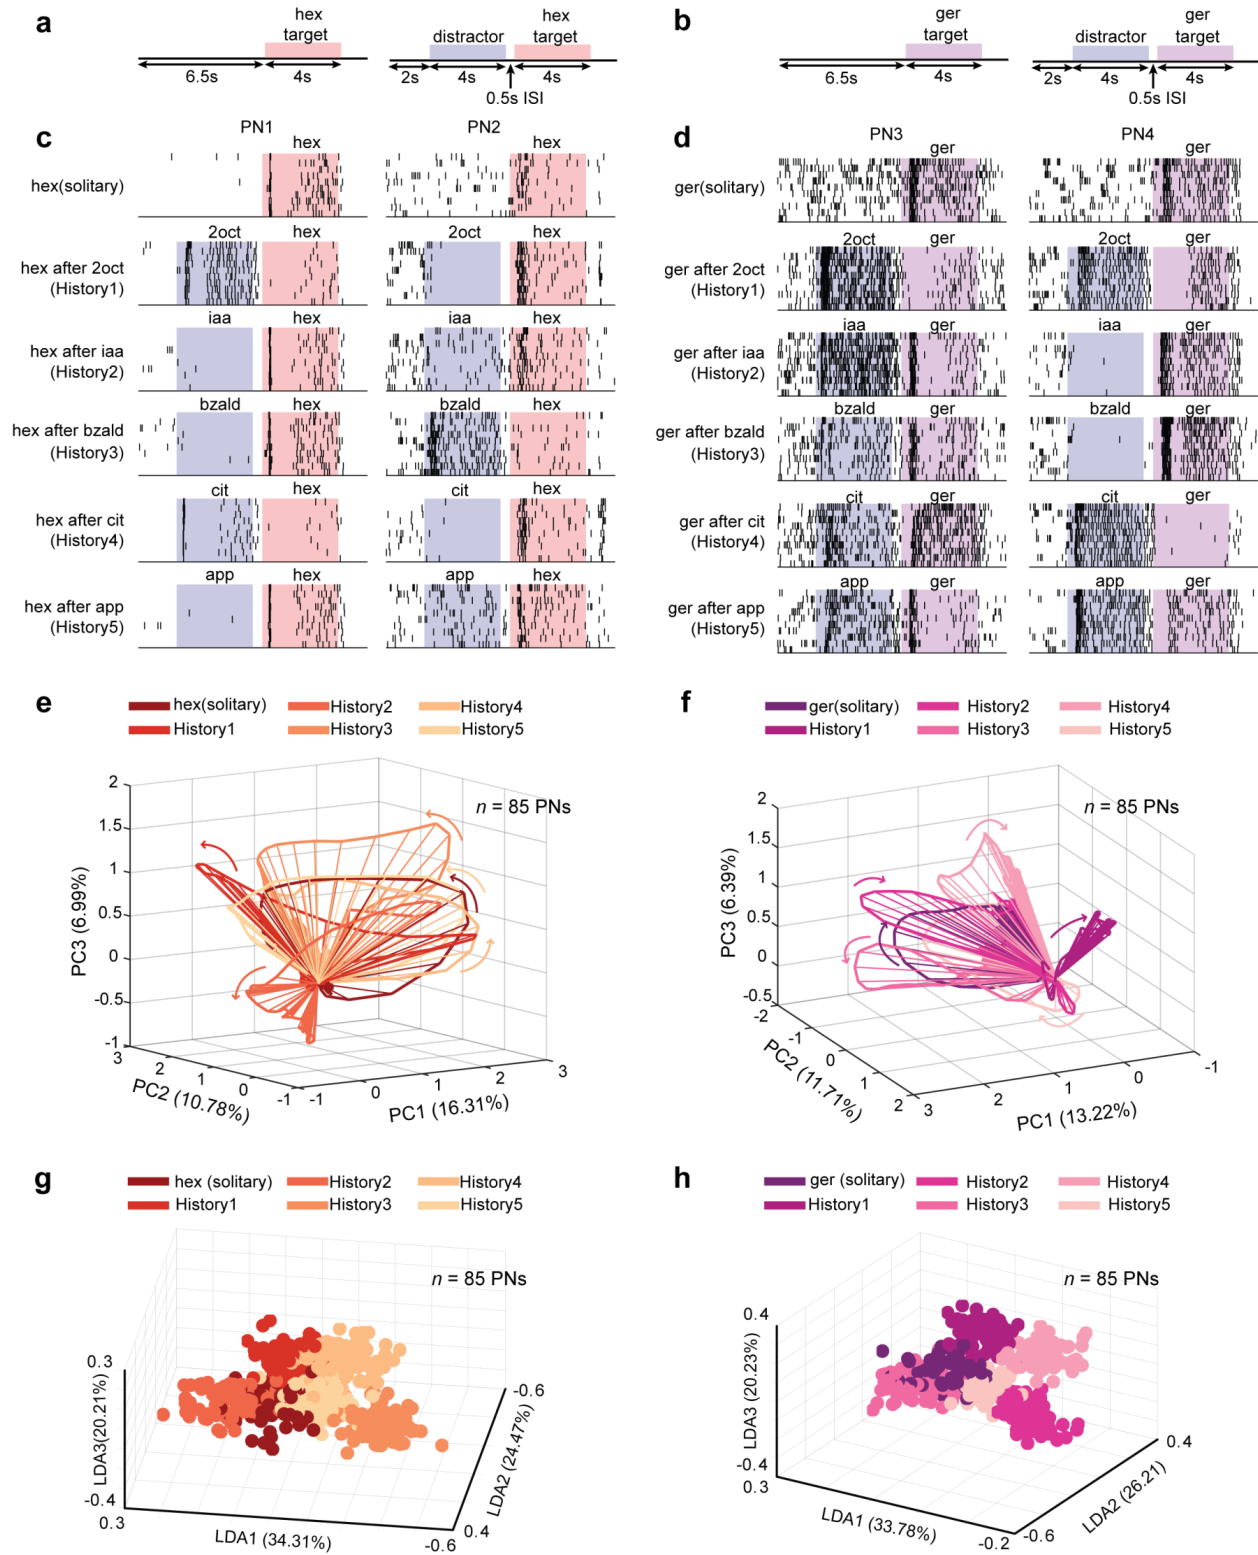

Figure 1

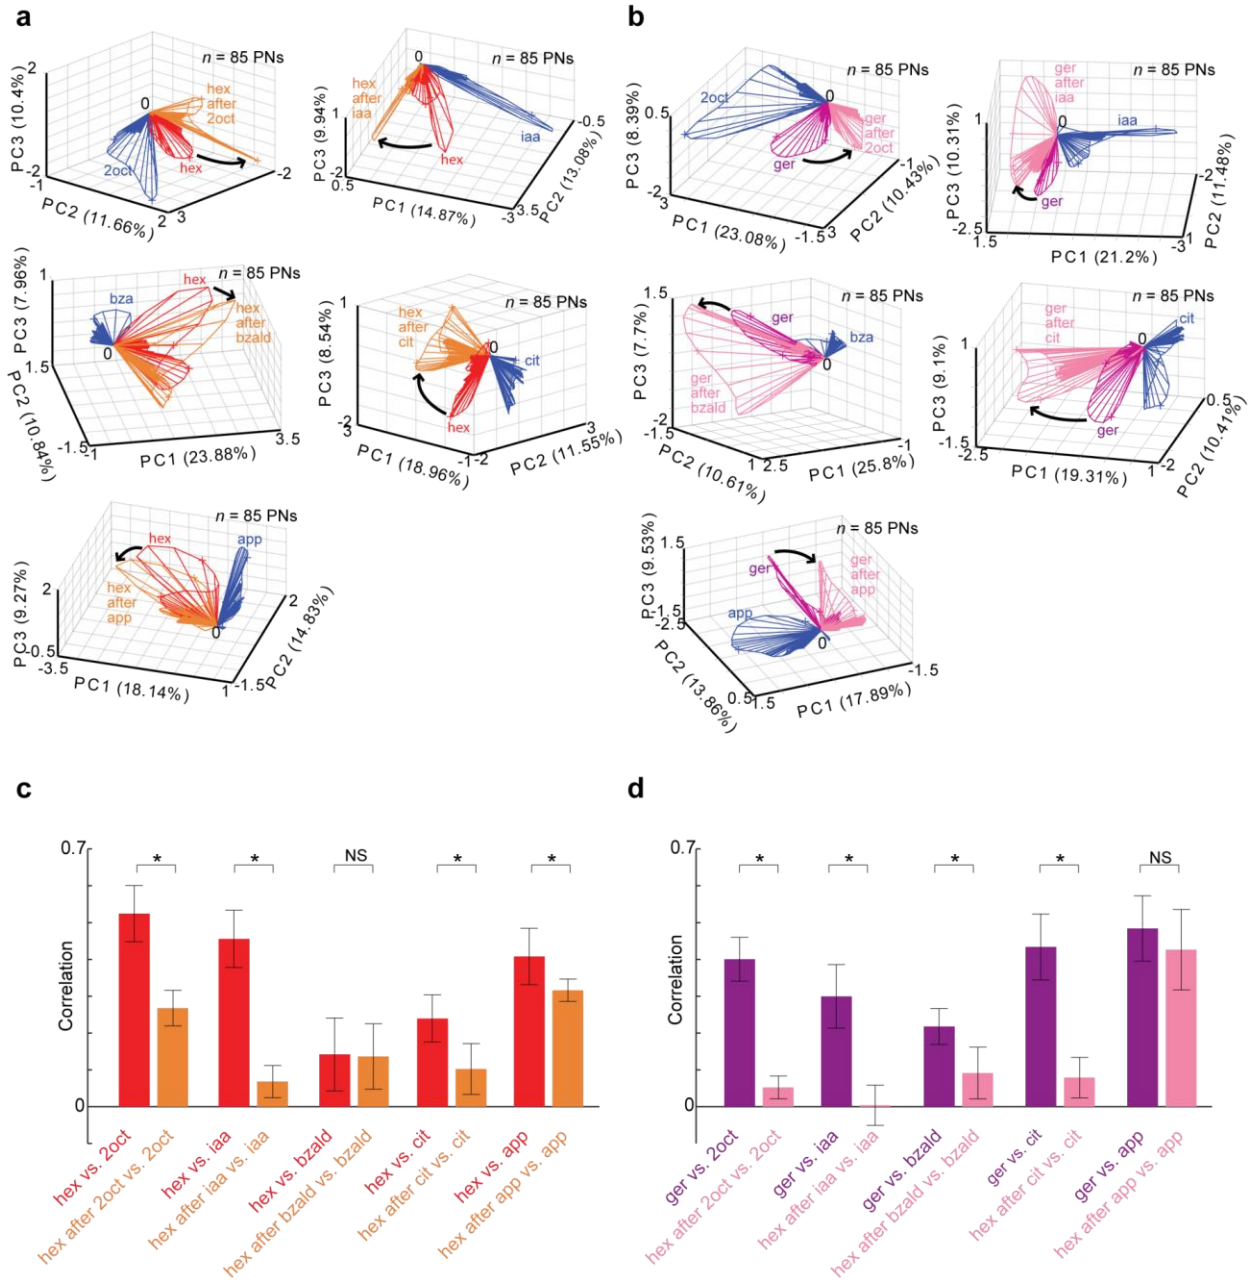

Figure 2

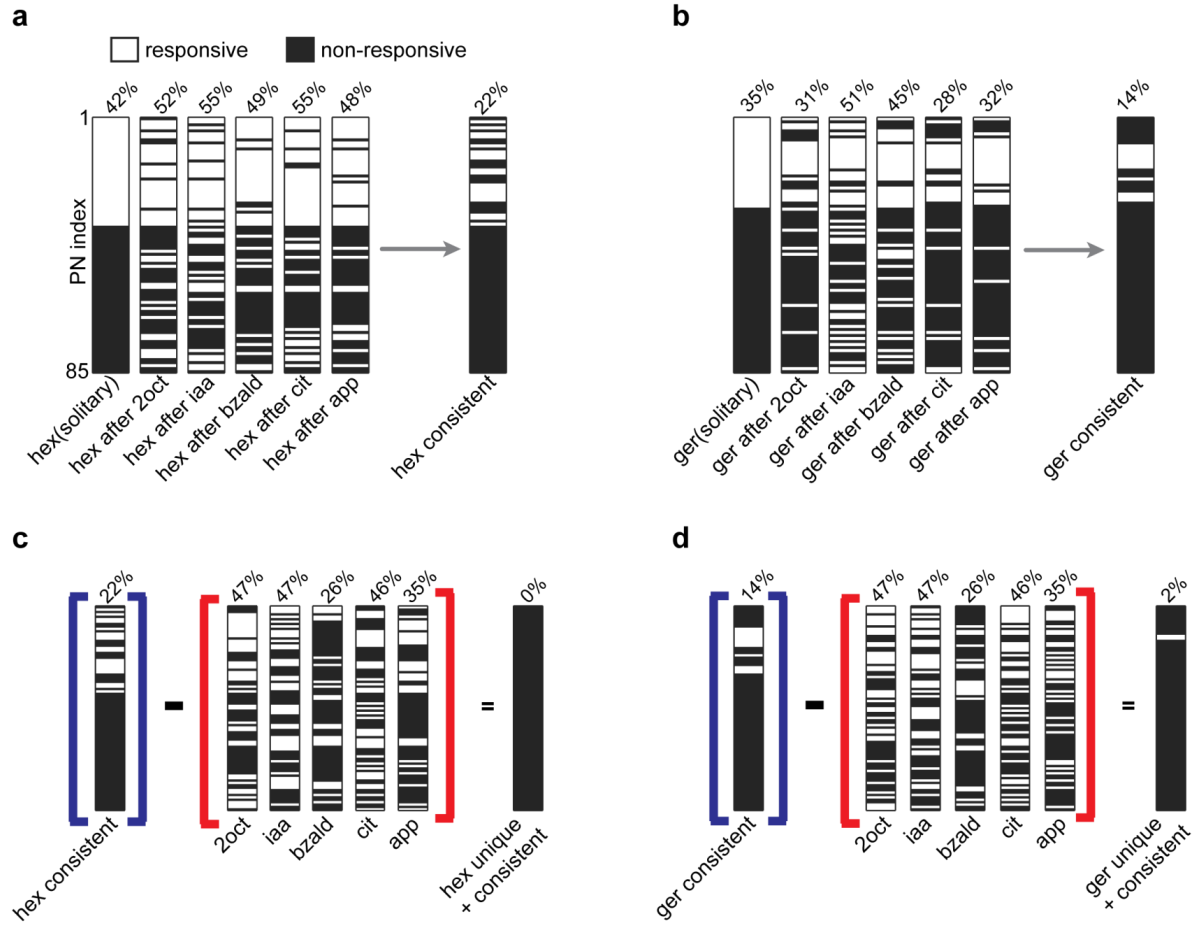

Figure 3

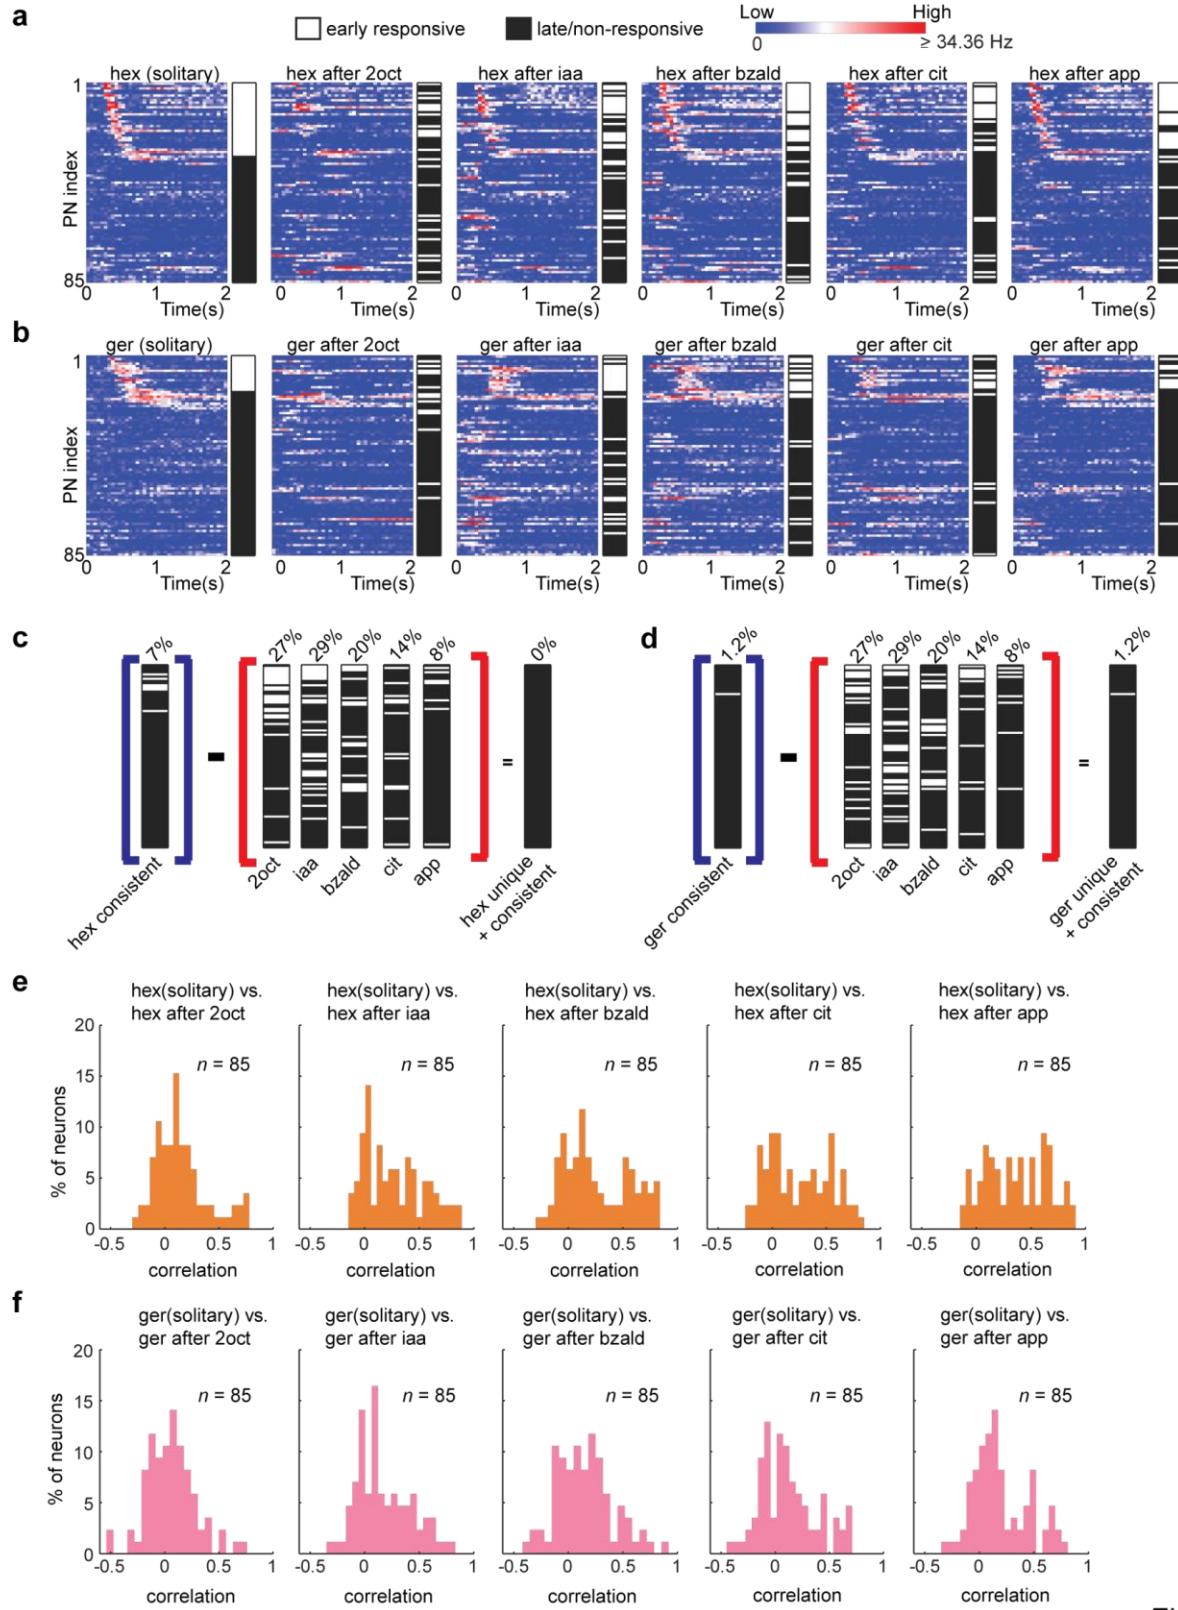

Figure 4



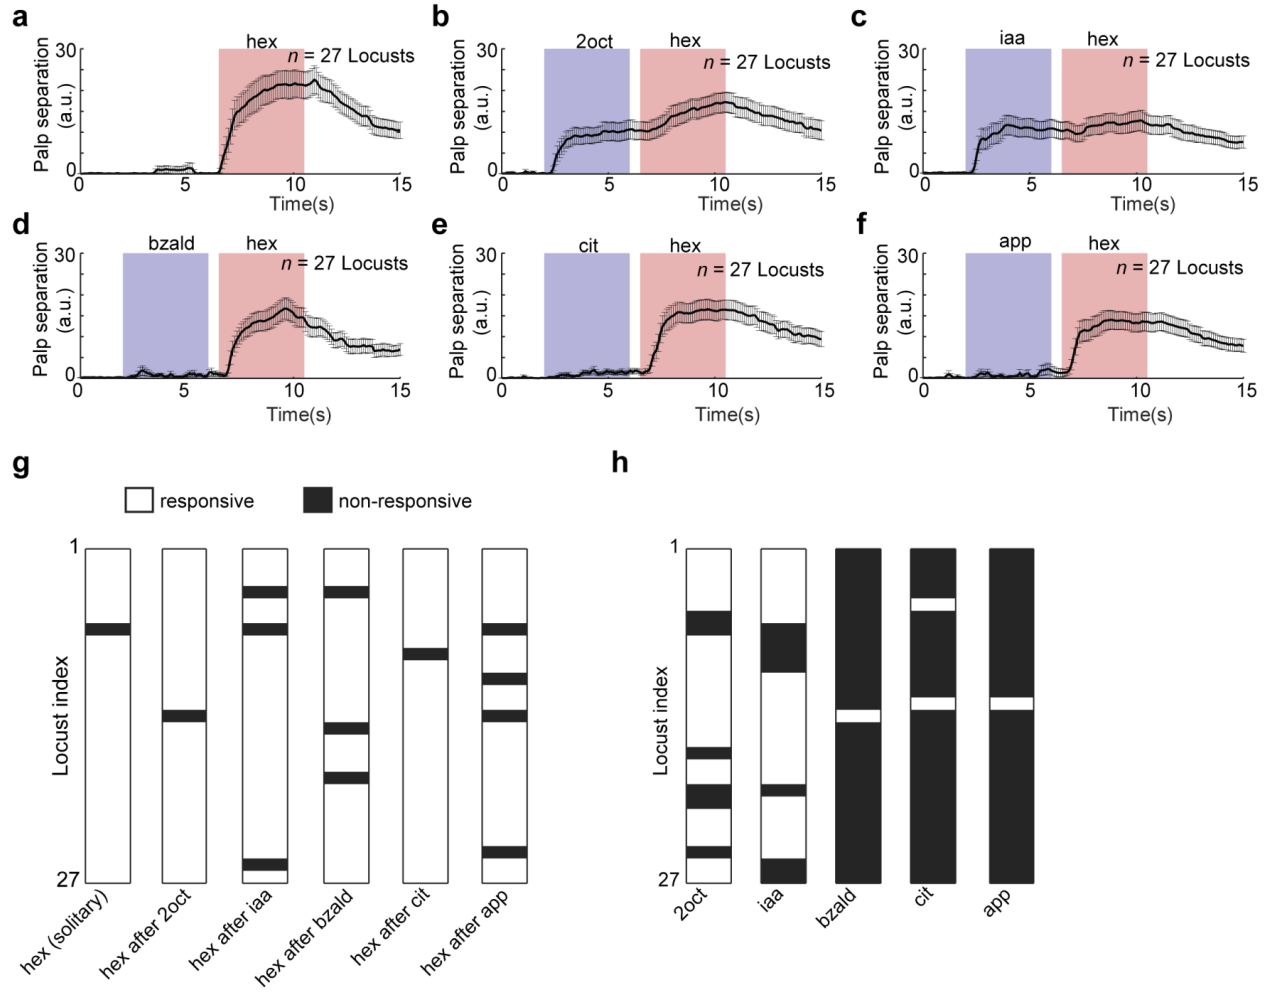

Figure 5

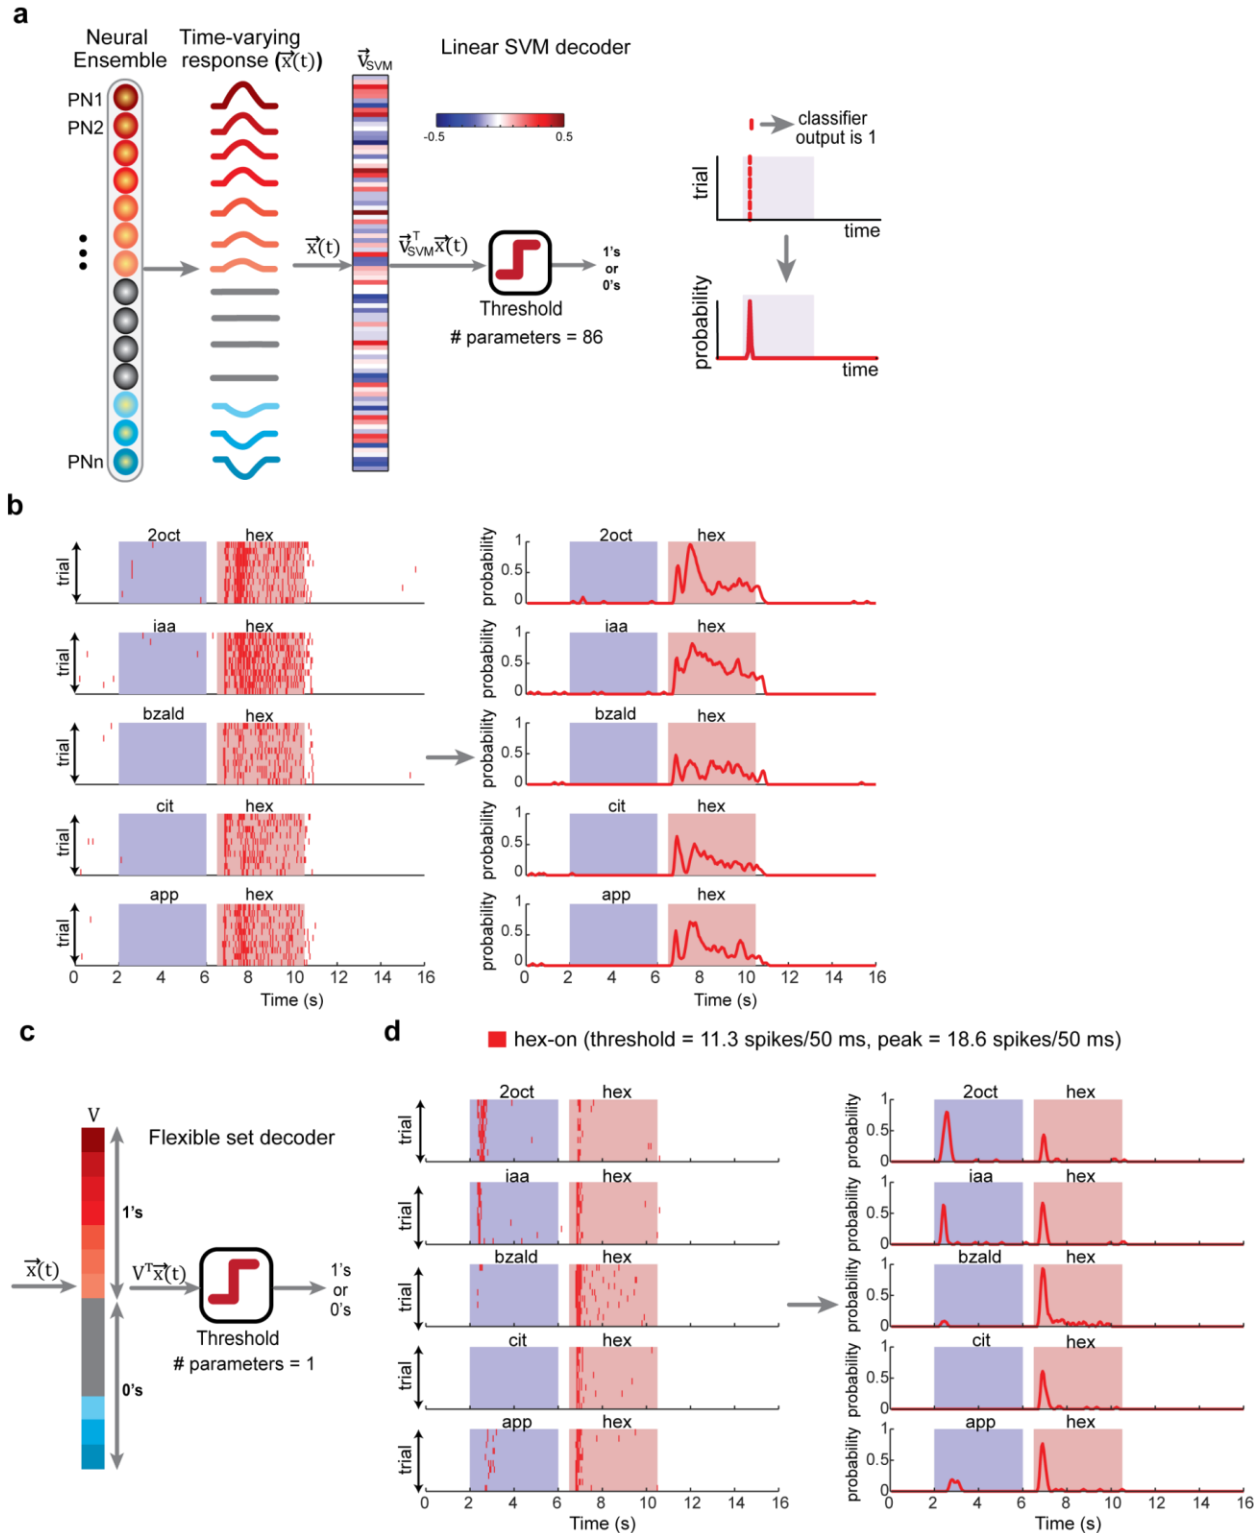

Figure 6

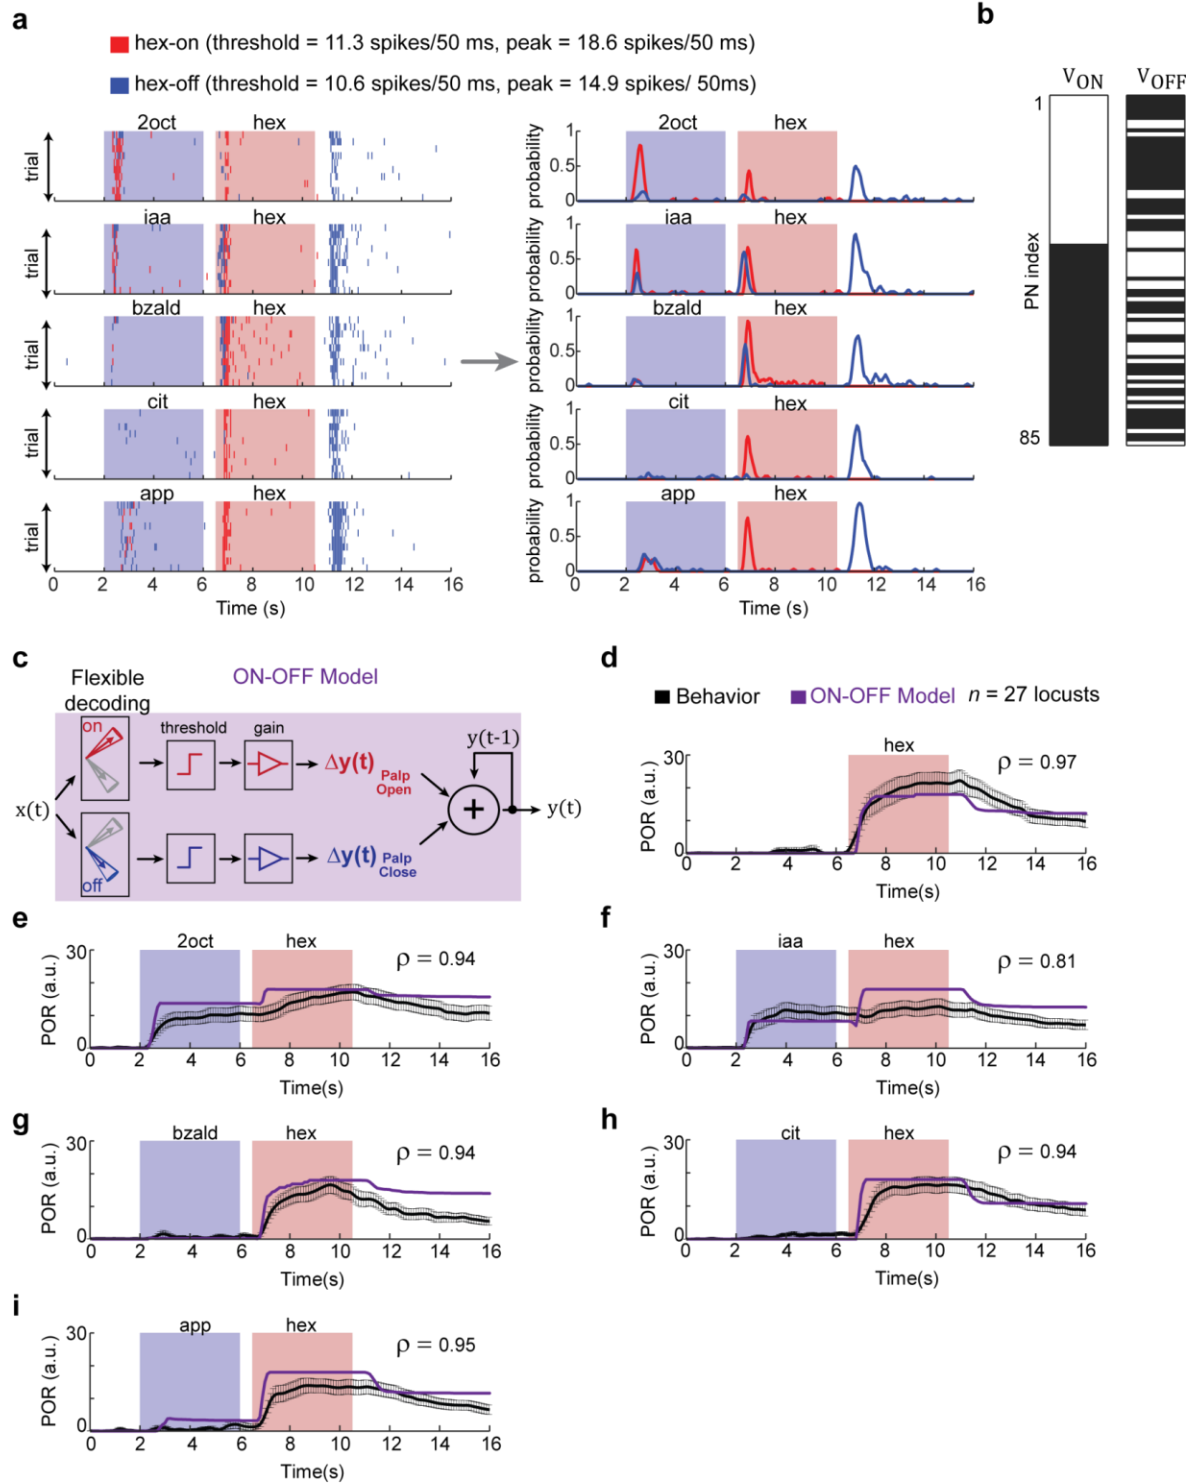

Figure 7

## METHODS:

**Odor stimulation:** Odor stimuli were delivered using a standard procedure<sup>24,25,35,36</sup>. The following odor panel was used: hexanol, geraniol, 2-octanol, isoamyl acetate, benzaldehyde, citral, and apple. All odorants were diluted to their 1% concentration by volume (v/v) in mineral oil. A carrier stream of desiccated and filtered air stream ( $0.75 \text{ L min}^{-1}$ ) was directed at the antenna to provide a constant flux. A constant volume ( $0.1 \text{ L min}^{-1}$ ) from the odor bottle headspace (60 ml sealed bottles contained 20 ml diluted odor solutions) was injected into the carrier stream using a pneumatic pico-pump (WPI Inc., PV-820) during stimulus presentations. A vacuum funnel placed right behind the locust antenna ensured removal of odor vapors. Each solitary or sequential presentation of an odorant was delivered in a pseudorandomized manner (blocks of 10 trials) with 60 s inter-trial intervals.

**Olfactory electrophysiology:** Young locusts (*Schistocerca americana*) of either sex with fully developed wings (post fifth instar) were selected from a crowded colony. After immobilizing locusts, the brain was exposed, desheathed, and continually perfused with locust saline as reported previously<sup>36,50</sup>. Extracellular recordings from the antennal lobe were made using a 16-channel, 4x4 silicon probes (NeuroNexus). Each electrode contact pad was gold plated such that its impedance was in the 200 – 300 k $\Omega$  range. Raw extracellular signals were filtered between 0.3 to 6 kHz and amplified at 10 k gain using a custom made 16-channel amplifier (Biology Electronics Shop; Caltech, Pasadena, CA). Raw data were acquired at 15kHz sampling rate using a LabView data acquisition system.

**PN spike sorting:** For spike sorting, we used a conservative approach that was described in earlier works<sup>51</sup>. We used the following criteria for the single-unit identification: cluster separation > 5 noise s.d., the number of spikes within 20 ms < 6.5%, and spike waveform variance < 6.5 noise s.d. Using this approach, a total of 85 PNs were identified from 9 locusts (11 antennal lobes).

**Dimensionality reduction analyses:** We used two dimensionality reduction techniques for visualizing ensemble PN responses: principal component analysis (PCA) and linear discriminant analysis (LDA). For both analyses, spiking activity of each PN was binned in 50 ms non-overlapping time bins and averaged across trials. Spike counts of all recorded PNs were aligned with respect to the stimulus onset and concatenated to form an 85-dimensional PN response vector per 50 ms time window. Therefore, for each odorant, we obtained a response matrix of the following dimensions: 85 neurons (rows) x 80-time bins (columns; 4s of activity).

To perform the PCA analysis shown in **Fig. 1**, we first concatenated the responses of the 85 PNs to solitary and sequential presentations of hexanol or geraniol (85 PNs x 480 time bins [6 presentations x 80 time bins]). Response covariance matrices (85 x 85) were computed for these concatenated data matrices. Each 85-dimensional PN response vector was then projected onto the three principal eigenvectors (for visualization).

PCA trajectories shown in **Fig. 2** were computed using a different response covariance matrix. Here, the PN ensemble responses to three stimuli were concatenated to form the data matrix: solitary target stimulus (hex or ger; 4s), solitary distractor stimulus (4s), target stimulus after distractor stimulus (4s of hex or ger exposure). This resulted in 85 PNs x 240 time bins data matrices [3 stimuli x 80 time bins].

For generating figures shown in **Fig. 1** and **Fig. 2**, PN responses after PCA dimensionality reduction were linked in the temporal order of occurrence to create odor trajectories. The pre-stimulus baseline activity in the first time bin was subtracted before plotting each response trajectory. The odor trajectories shown were also smoothed using a three-point moving-average, low-pass filter.

LDA dimensionality reduction<sup>39</sup> analysis was also performed by first concatenating all high-dimensional PN response vectors that needed to be visualized. The projection vectors were determined such that they maximized separation between responses of different stimuli while at the same time also reducing variance within responses generated by a single stimulus.

To quantify results, we performed a classification analysis. We performed a leave-one-trial-out cross validation (i.e. PN response of one trial for one hex or ger introductions was left out). LDA projection vectors were computed using all other hex or ger introductions. The test trial to be classified was projected using the computed LDA eigenvectors and then assigned the same class label as the nearest cluster of data points (centroid of data points belonging to a particular class; class, in this case, is the hex or ger presentations with a particular stimulus history). This was repeated systematically leaving out each trial and computing its class label. The classification results are then shown as a confusion matrix in **Supplementary Fig. 1e,f**.

**PN response categorization:** For analysis in this work we classified a projection neuron as ‘responders’ if the spike counts in any time bin during the stimulus presentation exceeded mean + 6.5 s.d. of pre-stimulus activity (2 s window just before onset of any stimulus). All PNs that did not meet this threshold were regarded as ‘non-responders.’

**Response latency for PNs:** We defined PN response latency as the first 50 ms time bin when the criterion for the responsive neuron was met (i.e. spike counts exceed mean + 6.5 s.d. of pre-stimulus activity). For sequential presentations, the response latency was determined as the first time bin after the derivative of PSTH became positive (used in **Fig. 4** and **Supplementary Fig. 3**).

**Contrast enhancement kernel for pairwise odor classification:** For the calculation of contrast enhancement kernel, we followed a method that has been previously reported<sup>52</sup>. Let suppose that the mean PN response (averaged over 4 s of stimulus exposure) is  $p^i$  (n-dimensional vector). We rectified the values of this vector so that each element  $x_k^i \geq 0$ . If the response patterns of two different odors were  $p^1$  and  $p^2$ , then the weight vector  $W$  was calculated as follows:

$$p^i = [x_1^i x_2^i \dots x_n^i]^T$$

$$W = \sum_{i=1}^2 (p^i - p_0^i) \cdot (p^i - p_0^i)^T - \sum_{i=1}^2 \sum_{j=1, j \neq i}^2 (p^i - p_0^i) \cdot (p^j - p_0^j)^T \quad (1)$$

where  $p_0$  is the mean pre-stimulus response averaged over a two second window.

**Support vector machine (SVM):** The PN response patterns to solitary introductions of hexanol, 2oct, iaa, bzald, cit, and app were used as training samples. We regarded this as a binary classification problem, where hex responses were considered as one class, and all other responses were regarded as the second class. We used a slack variable to avoid overfitting and the box constraint was taken to be 0.01 (fitsvm in MATLAB). The optimal weight vector  $v_{svm}^T$  was determined using training samples and used to classify response patterns generated during sequential stimulus presentations as follows:

$$h(x(t)) = \text{sign}(v_{svm}^T x(t) + b) \quad (2)$$

where  $x(t)$  is the 85-dimensional PN spike counts in a 50 ms time bin, the sign function results in ‘1’ when the input is classified as ‘hexanol present’ and ‘0’ corresponded to ‘hexanol absent.’

**Behavior experiments:** Behavioral experiments were performed using locusts of either sex. All locusts used were from a crowded colony that was kept on a 12 h day – 12 h night cycle (7 am – 7 pm day). All behavioral experiments were performed between 10 am – 3:30 pm.

Locusts were starved for 24 hours prior to their use in the appetitive-conditioning assay. The protocols that we used in this study for training locusts and tracking their palp-movements were identical to an earlier study<sup>35</sup>. The odor delivery setup and the stimulus sequences used were identical to that described for the electrophysiology experiments.

Hexanol diluted in mineral oil (hex 1%) was used as the conditioned stimulus for all behavioral experiments in this study. Wheat grass was used as the unconditioned stimulus. During each training trial, the conditioned stimulus was presented for 6 s. Food reward was given 3 s after the onset of the conditioned stimulus. Food was given manually for the duration of approximately 10 seconds. The training phase included a total of six training trials with a ten-minute interval between successive trials. Only locusts that accepted food reward in at least four out of the six training trials and had a palp-opening response (POR) in at least three training trials were regarded as ‘trained locusts’ and retained for the testing phase (75% of the locusts (30/40) fell into this category). The imaging software was not able to robustly track the palp movements of three of the trained locusts (3/30) and, therefore, these locusts were excluded from all analyses.

In the unrewarded testing phase, locust PORs were evaluated using six test trials. The first trial in all tests was the solitary presentation of 4 s of hexanol. This was done to ensure that trained locusts were able to recognize the solitary presentations of the trained stimulus (26/27 locusts had a strong POR to solitary hexanol). In the subsequent five trials, the conditioned stimulus was presented in non-overlapping two odor sequences used in electrophysiology experiments. The two odor stimulus sequences were presented in a pseudo-randomized manner. The inter-trial delay between test phase trials was set to 25 minutes.

**Locust response categorization:** For analysis in **Fig. 5g,h**, we classified a locust to be ‘*responsive*’ when the POR to an odor presentation was 6.5 s.d. above pre-stimulus baseline response. Further, the POR during odor presentation had to remain greater than 20% of its peak value for at least 1 s. All the other cases were marked as ‘*non-responsive*’.

## REFERENCES:

- 1 Panzeri, S., Harvey, C. D., Piasini, E., Latham, P. E. & Fellin, T. Cracking the Neural Code for Sensory Perception by Combining Statistics, Intervention, and Behavior. *Neuron* **93**, 491-507, doi:10.1016/j.neuron.2016.12.036 (2017).
- 2 Jacobs, A. L. *et al.* Ruling out and ruling in neural codes. *Proceedings of the National Academy of Sciences of the United States of America* **106**, 5936-5941, doi:10.1073/pnas.0900573106 (2009).
- 3 Bialek, W., Rieke, F., de Ruyter van Steveninck, R. R. & Warland, D. Reading a neural code. *Science* **252**, 1854-1857 (1991).
- 4 Laurent, G. Olfactory network dynamics and the coding of multidimensional signals. *Nat Rev Neurosci* **3**, 884-895, doi:10.1038/nrn964 (2002).
- 5 Stanley, G. B. Reading and writing the neural code. *Nat Neurosci* **16**, 259-263, doi:10.1038/nn.3330 (2013).
- 6 Nicolelis, M. A. & Ribeiro, S. Seeking the neural code. *Scientific American* **295**, 70-77 (2006).
- 7 Georgopoulos, A. P., Schwartz, A. B. & Kettner, R. E. Neuronal population coding of movement direction. *Science* **233**, 1416-1419 (1986).
- 8 Choi, G. B. *et al.* Driving opposing behaviors with ensembles of piriform neurons. *Cell* **146**, 1004-1015, doi:10.1016/j.cell.2011.07.041 (2011).
- 9 Kreher, S. A., Mathew, D., Kim, J. & Carlson, J. R. Translation of sensory input into behavioral output via an olfactory system. *Neuron* **59**, 110-124, doi:10.1016/j.neuron.2008.06.010 (2008).
- 10 Koulakov, A., Gelperin, A. & Rinberg, D. Olfactory coding with all-or-nothing glomeruli. *Journal of Neurophysiology* **98**, 3134-3142, doi:10.1152/jn.00560.2007 (2007).
- 11 Mathis, A., Rokni, D., Kapoor, V., Bethge, M. & Murthy, V. N. Reading Out Olfactory Receptors: Feedforward Circuits Detect Odors in Mixtures without Demixing. *Neuron* **91**, 1110-1123, doi:10.1016/j.neuron.2016.08.007 (2016).
- 12 Bell, J. S. & Wilson, R. I. Behavior Reveals Selective Summation and Max Pooling among Olfactory Processing Channels. *Neuron* **91**, 425-438, doi:10.1016/j.neuron.2016.06.011 (2016).
- 13 Semmelhack, J. L. & Wang, J. W. Select *Drosophila* glomeruli mediate innate olfactory attraction and aversion. *Nature* **459**, 218-U100, doi:10.1038/nature07983 (2009).
- 14 Galan, R. F., Sachse, S., Galizia, C. G. & Herz, A. V. M. Odor-driven attractor dynamics in the antennal lobe allow for simple and rapid olfactory pattern classification. *Neural Comput* **16**, 999-1012, doi:10.1162/089976604773135078 (2004).
- 15 Riffell, J. A., Lei, H. & Hildebrand, J. G. Neural correlates of behavior in the moth *Manduca sexta* in response to complex odors. *Proceedings of the National Academy of Sciences of the United States of America* **106**, 19219-19226, doi:10.1073/pnas.0910592106 (2009).
- 16 Stopfer, M., Bhagavan, S., Smith, B. H. & Laurent, G. Impaired odour discrimination on desynchronization of odour-encoding neural assemblies. *Nature* **390**, 70-74 (1997).
- 17 Cury, K. M. & Uchida, N. Robust Odor Coding via Inhalation-Coupled Transient Activity in the Mammalian Olfactory Bulb. *Neuron* **68**, 570-585, doi:10.1016/j.neuron.2010.09.040 (2010).
- 18 Haddad, R. *et al.* Olfactory cortical neurons read out a relative time code in the olfactory bulb. *Nature Neuroscience* **16**, 949-U227, doi:10.1038/nn.3407 (2013).
- 19 Junek, S., Kludt, E., Wolf, F. & Schild, D. Olfactory Coding with Patterns of Response Latencies. *Neuron* **67**, 872-884, doi:10.1016/j.neuron.2010.08.005 (2010).

- 20 Friedrich, R. W. & Laurent, G. Dynamic optimization of odor representations by slow temporal patterning of mitral cell activity. *Science* **291**, 889-894, doi:10.1126/science.291.5505.889 (2001).
- 21 Laurent, G., Wehr, M. & Davidowitz, H. Temporal representations of odors in an olfactory network. *J Neurosci* **16**, 3837-3847 (1996).
- 22 Vickers, N. J., Christensen, T. A., Baker, T. C. & Hildebrand, J. G. Odour-plume dynamics influence the brain's olfactory code. *Nature* **410**, 466-470, doi:10.1038/35068559 (2001).
- 23 Stopfer, M., Jayaraman, V. & Laurent, G. Intensity versus identity coding in an olfactory system. *Neuron* **39**, 991-1004, doi:DOI 10.1016/j.neuron.2003.08.011 (2003).
- 24 Saha, D. *et al.* A spatiotemporal coding mechanism for backgroundinvariant odor recognition. *Nature Neuroscience* **16**, 1830-1839, doi:10.1038/nn.3570 (2013).
- 25 Saha, D. *et al.* Engaging and disengaging recurrent inhibition coincides with sensing and unsensing of a sensory stimulus. *Nat Commun* **8**, 15413, doi:10.1038/ncomms15413 (2017).
- 26 Bathellier, B., Buhl, D. L., Accolla, R. & Carleton, A. Dynamic ensemble odor coding in the mammalian olfactory bulb: Sensory information at different timescales. *Neuron* **57**, 586-598, doi:10.1016/j.neuron.2008.02.011 (2008).
- 27 Broome, B. M., Jayaraman, V. & Laurent, G. Encoding and decoding of overlapping odor sequences. *Neuron* **51**, 467-482, doi:10.1016/j.neuron.2006.07.018 (2006).
- 28 Bartlett, E. L. & Wang, X. Long-lasting modulation by stimulus context in primate auditory cortex. *J Neurophysiol* **94**, 83-104, doi:10.1152/jn.01124.2004 (2005).
- 29 Benucci, A., Ringach, D. L. & Carandini, M. Coding of stimulus sequences by population responses in visual cortex. *Nat Neurosci* **12**, 1317-1324, doi:10.1038/nn.2398 (2009).
- 30 Morcos, A. S. & Harvey, C. D. History-dependent variability in population dynamics during evidence accumulation in cortex. *Nat Neurosci* **19**, 1672-1681, doi:10.1038/nn.4403 (2016).
- 31 Sun, Y. *et al.* Neural signatures of dynamic stimulus selection in *Drosophila*. *Nat Neurosci* **20**, 1104-1113, doi:10.1038/nn.4581 (2017).
- 32 Wegel, R. L., and Lane, C. E. The auditory masking of one pure tone by another and its probable relation to the dynamics of the inner ear. *Phys. Rev.* **23**, 266-285 (1924).
- 33 Ito, I., Ong, R. C. Y., Raman, B. & Stopfer, M. Sparse odor representation and olfactory learning. *Nature Neuroscience* **11**, 1177-1184, doi:10.1038/nn.2192 (2008).
- 34 Mazor, O. & Laurent, G. Transient dynamics versus fixed points in odor representations by locust antennal lobe projection neurons. *Neuron* **48**, 661-673, doi:10.1016/j.neuron.2005.09.032 (2005).
- 35 Saha, D. *et al.* Behavioural correlates of combinatorial versus temporal features of odour codes. *Nat Commun* **6**, 6953, doi:10.1038/ncomms7953 (2015).
- 36 Brown, S. L., Joseph, J. & Stopfer, M. Encoding a temporally structured stimulus with a temporally structured neural representation. *Nat Neurosci* **8**, 1568-1576, doi:10.1038/nn1559 (2005).
- 37 Laurent, G., Wehr, M. & Davidowitz, H. Temporal representations of odors in an olfactory network. *J Neurosci* **16**, 3837-3847 (1996).
- 38 Raman, B., Joseph, J., Tang, J. & Stopfer, M. Temporally Diverse Firing Patterns in Olfactory Receptor Neurons Underlie Spatiotemporal Neural Codes for Odors. *J Neurosci* **30**, 1994-2006, doi:10.1523/Jneurosci.5639-09.2010 (2010).
- 39 Bishop, C. M. *Pattern recognition and machine learning*. (springer, 2006).
- 40 Joseph, J., Dunn, F. A. & Stopfer, M. Spontaneous olfactory receptor neuron activity determines follower cell response properties. *J Neurosci* **32**, 2900-2910, doi:10.1523/JNEUROSCI.4207-11.2012 (2012).



- 41 Stopfer, M. & Laurent, G. Short-term memory in olfactory network dynamics. *Nature* **402**, 664-668, doi:10.1038/45244 (1999).
- 42 Min, S., Ai, M., Shin, S. A. & Suh, G. S. Dedicated olfactory neurons mediating attraction behavior to ammonia and amines in *Drosophila*. *Proceedings of the National Academy of Sciences of the United States of America* **110**, E1321-1329, doi:10.1073/pnas.1215680110 (2013).
- 43 Inada, K., Tsuchimoto, Y. & Kazama, H. Origins of Cell-Type-Specific Olfactory Processing in the *Drosophila* Mushroom Body Circuit. *Neuron* **95**, 357-367 e354, doi:10.1016/j.neuron.2017.06.039 (2017).
- 44 Jortner, R. A., Farivar, S. S. & Laurent, G. A simple connectivity scheme for sparse coding in an olfactory system. *J Neurosci* **27**, 1659-1669, doi:10.1523/JNEUROSCI.4171-06.2007 (2007).
- 45 Gruntman, E. & Turner, G. C. Integration of the olfactory code across dendritic claws of single mushroom body neurons. *Nat Neurosci* **16**, 1821-1829, doi:10.1038/nn.3547 (2013).
- 46 Nagel, K. I., Hong, E. J. & Wilson, R. I. Synaptic and circuit mechanisms promoting broadband transmission of olfactory stimulus dynamics. *Nat Neurosci* **18**, 56-65, doi:10.1038/nn.3895 (2015).
- 47 Kazama, H. & Wilson, R. I. Homeostatic matching and nonlinear amplification at identified central synapses. *Neuron* **58**, 401-413, doi:10.1016/j.neuron.2008.02.030 (2008).
- 48 Kurahashi, T. & Menini, A. Mechanism of odorant adaptation in the olfactory receptor cell. *Nature* **385**, 725-729, doi:10.1038/385725a0 (1997).
- 49 Nagel, K. I. & Wilson, R. I. Biophysical mechanisms underlying olfactory receptor neuron dynamics. *Nat Neurosci* **14**, 208-216, doi:10.1038/nn.2725 (2011).
- 50 Saha, D., Leong, K., Katta, N. & Raman, B. Multi-unit recording methods to characterize neural activity in the locust (*Schistocerca americana*) olfactory circuits. *J Vis Exp*, doi:10.3791/50139 (2013).
- 51 Pouzat, C., Mazor, O. & Laurent, G. Using noise signature to optimize spike-sorting and to assess neuronal classification quality. *J Neurosci Methods* **122**, 43-57 (2002).
- 52 Gutierrez-Galvez, A. & Gutierrez-Osuna, R. Contrast enhancement and background suppression of chemosensor array patterns with the KIII model. *Int J Intell Syst* **21**, 937-953, doi:10.1002/int.20170 (2006).
- 53 Dosovitskiy, A., Springenberg, J. T., Tatarchenko, M. & Brox, T. Learning to Generate Chairs, Tables and Cars with Convolutional Networks. *IEEE transactions on pattern analysis and machine intelligence* **39**, 692-705, doi:10.1109/TPAMI.2016.2567384 (2017).

## SUPPLEMENTARY FIGURE CAPTIONS:

### Supplementary Figure 1

**(a)** Comparisons between the mean spike count (across 4 s) during sequential presentations of hexanol (y axis) and solitary presentation of hexanol (x axis) are shown. Mean  $\pm$  s.e.m over ten trials are shown for all the eighty-five PNs. Each PN is color coded based on whether the spike counts increased (in red), decreased (in blue), or no significant change (gray in spike count for two hexanol presentations compared ( $P < 0.05$ , one-way ANOVA;  $n = 85$  PNs).

**(b)** Similar plot as in **panel a** but comparing the spike counts during the five sequential presentations of geraniol with those observed during solitary geraniol introduction.

**(c)** The percentages of PNs ( $n = 85$  PNs) with a significant increase (red) or decrease (blue) in spike counts are shown for five sequential presentations of hexanol.

**(d)** Similar plot as in **panel c** but summarizing increase and decrease in PN activity during the five sequential presentations of geraniol.

**(e)** The separability of the six PN response clusters revealed in **Fig. 1g,h** is quantified and shown as a confusion matrix. Rows correspond to the actual stimulus identity and the columns indicate the predicted stimulus identity. The classification was done using the nearest centroid method with leave-one-out cross-validation (see Methods). Note that the confusion matrix is mostly diagonal indicating that the PN responses evoked by the same stimulus presented with different histories are distinct.

**(f)** Similar plot as in **panel e** but the confusion matrix but analyzing the response separability of the solitary and sequential geraniol presentations.

### Supplementary Figure 2

**(a)** Comparison between the mean firing rates averaged across two distinct sets of PNs is shown for the solitary (red trace) and sequential presentations (orange traces) of hex. Overlapping PNs correspond to the set of PNs that were responsive to both the target (hex) and distractor odorant. 'Non-overlapping PNs' correspond to the remaining set of PNs that were not 'overlapping PNs'. Left panel shows the firing rate of overlapping PNs averaged across trials ( $n = 10$ ). Right panel shows the firing rate of non-overlapping PNs averaged across ten trials. The percentage of overlapping PNs (i.e. co-activation) for each distractor odorant is shown.

**(b)** Similar plots as in **panel a** but comparing the mean firing rates of overlapping and non-overlapping PNs during solitary and sequential geraniol presentations.

### Supplementary Figure 3

**(a)** Left panel, raster plots showing spiking response of a PN to solitary and sequential introductions of hexanol. Same conventions as **Fig. 1c**. Right panel, mean spike counts in 50 ms time bins across trials are plotted as a function of time. The first time bin when the firing rate exceeds a fixed threshold was defined as its response latency and is identified using a dotted vertical line in each panel.

**(b)** Similar plots as in **panel a** but showing the response of a different PN to solitary and sequential introductions of geraniol. The evolution of firing rates over time and the response latency for each geraniol presentation are shown.

**(c)** Left panel, raster plot showing a representative PNs spiking responses to different hexanol introductions. Right panel, mean spike counts plotted as a function of time. Correlations between firing rate patterns observed during different sequential hexanol introductions with solitary hexanol presentations are shown.

**(d)** Similar plot as in **panel c** showing the spiking response variations for different geraniol introductions.

### Supplementary Figure 5

**(a)** A schematic of a pairwise odor classifier is shown. The input to the classifier is an eighty-five-dimensional ensemble PN activity vector in a 50 ms time bin ( $x(t)$ ). This was subsequently multiplied by a contrast enhancement kernel ( $W$ ) to generate a contrast-enhanced response vector ( $y(t)$ ). A second eighty-five-dimensional binary vector ( $v$ ) was constructed with a '1' assigned for PNs responsive to hexanol after contrast enhancement and '0' for non-responsive PNs. The contributions of all responsive PNs were summed (by taking dot product of  $y(t)$  and  $v$ ) and thresholded to determine whether the target odorant was present or absent during that 50 ms time bin. Classification was done on a bin-by-bin, trial-by-trial basis. Classification results are shown in a raster format with a red tick mark indicating target present. The probability of target stimulus recognition (number of correct recognition in a 50 ms time bin / number of trials) was determined and plotted as a function of time.

**(b)** Contrast-enhancement of the mean firing rates across PNs (averaged across time;  $n = 80$  time bins) is shown. ' $p1$ ' and ' $p2$ ' correspond to the mean firing rates of responses to hexanol (red) and citral (blue) respectively. Left panel shows the raw firing rates, and the right panel reveals contrast enhancement response patterns after multiplication of  $p1$  and  $p2$  by the contrast enhancement kernel  $W$  (see Methods). As can be noted, the mean firing rates of commonly active neurons were suppressed and the mean firing rates of PNs that responded uniquely to hex and cit were enhanced.

**(c)** A step-by-step illustration of how the contrast enhancement kernel was computed is shown.

**(d)** Left panel, bin-by-bin, trial-by-trial classification results are shown for the five sequential introductions of hexanol. As noted before, each red tick mark indicates that the hex was recognized as being present in that time bin. Right panel, the probabilities of hex classification, across trials are plotted as a function of time for different hexanol presentations.

### Supplementary Figure 5

Classification results for the digital flexible set decoder are shown as a bin-by-bin, trial-by-trial raster plot and as classification probabilities over time. Same convention as that in **Fig. 7a**. For any 50 ms time bin, the threshold for ON classification was set to be 3-of-36 PNs must be responding to the stimulus presentation (i.e. firing rate  $> 6.5$  s.d. of pre-stimulus activity). The threshold for OFF classification was also set to be 3-of-33 PNs. The 36 hex-ON PNs and 33 hex-OFF PNs were determined based on solitary hexanol presentations alone. Note that these classification results are very similar to the analog version that we presented in **Fig. 7a**.

## Supplementary Figure 6

**(a, b)** A schematic illustration of the flexible set decoder is shown. Here the problem is cast as one of object recognition (i.e. chair recognition). Images of different chairs (from a published dataset<sup>53</sup>) and their features are tabulated.

**(c)** A schematic of an OR-of-ANDs or disjunction-of-conjunction classifier is shown. Input features are binary 'feature present' or 'feature absent'. The weight vectors are constant and set based on an ideal object (Chair 2 in **panel a**): the weight vector component is a '1' if the feature is present in the ideal chair, and '0' if it not present. The only free parameter in the OR-of-ANDs classifier is the threshold of the output node ( $\theta$ ). If the value of the threshold is set below the total number of features present in the ideal object (for example  $\theta = 2$ ), then the presence of any two of the four features will allow recognition of the object (i.e. flexible decoding). This can be written as a set of logical OR-of-ANDs operation.

**(d)** The list of analogies between this object/chair recognition illustration and flexible odor decoding proposed in this manuscript are listed in a table.

## Supplemental Figure 7

**(a)** Similar trajectory plot as shown in **Fig. 2a** but comparing the population PN responses generated during the presentation of two hexanol pulses. The second pulse of hexanol was presented 2 s after the termination of the first pulse.

**(b)** Similar barcodes as in **Fig. 3a** but identifying the responsive PNs in the first and the second pulse.

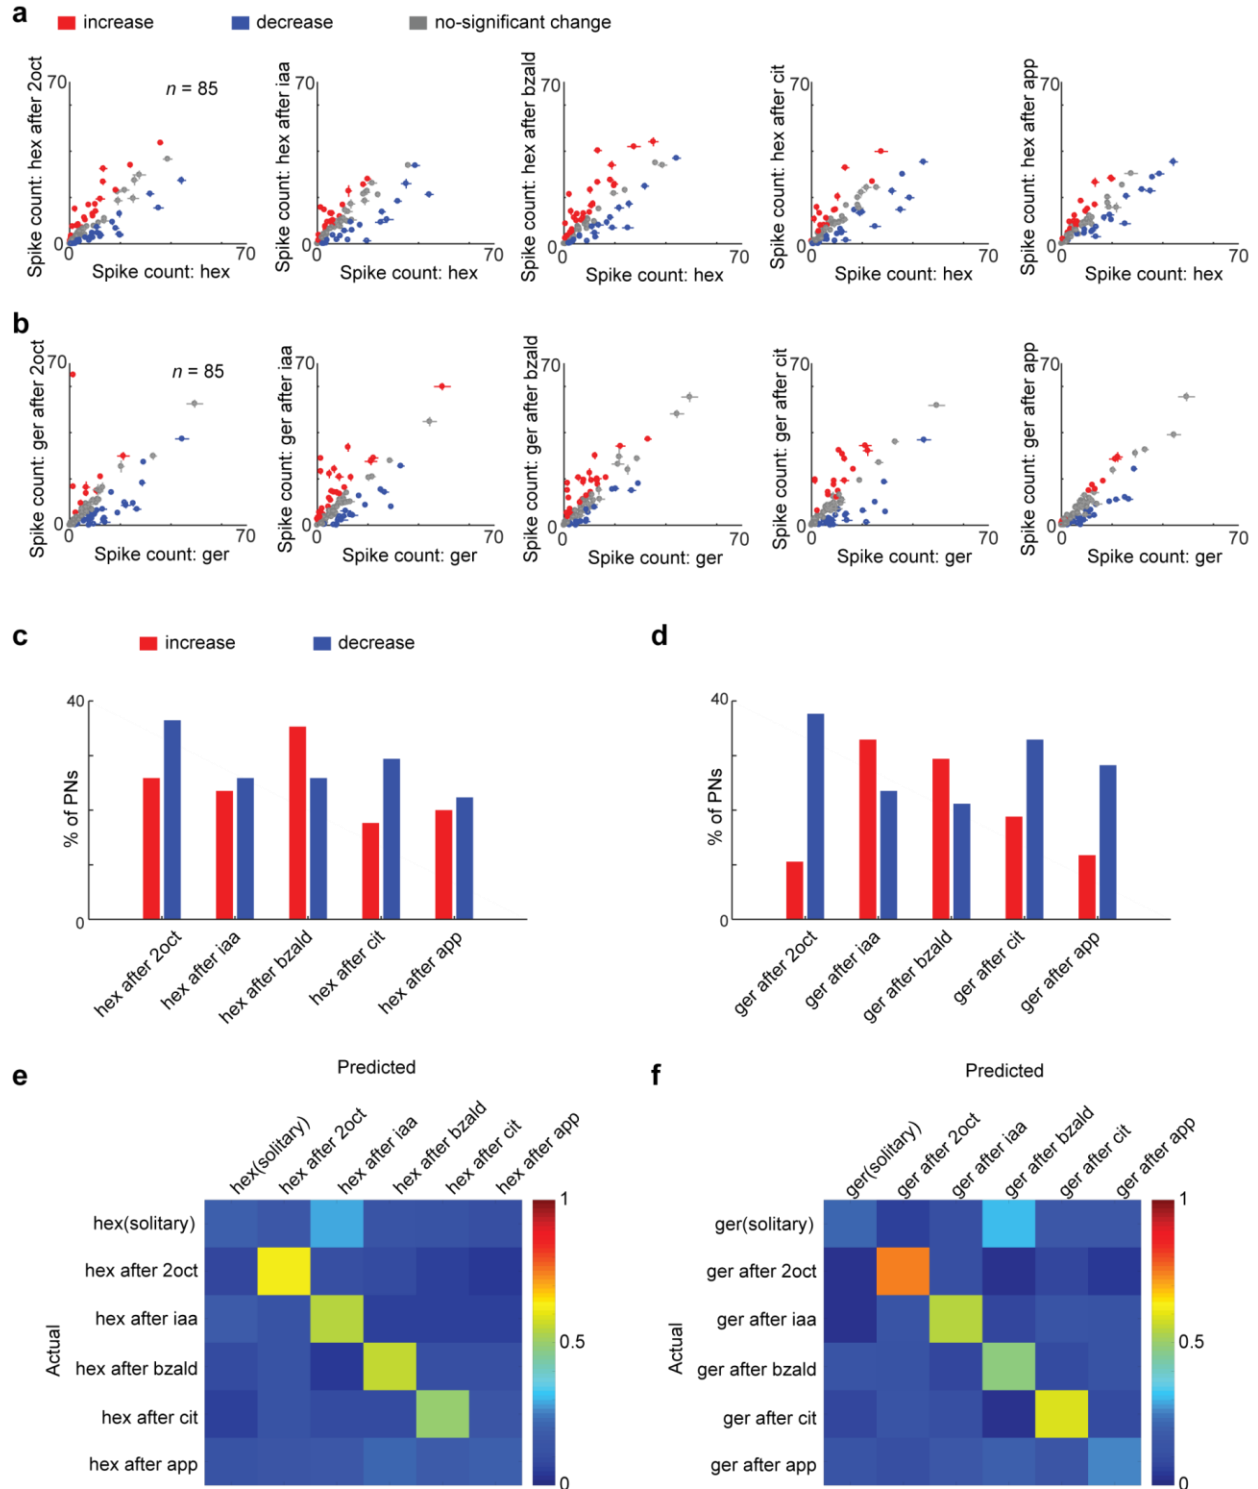

Supplementary Figure 1

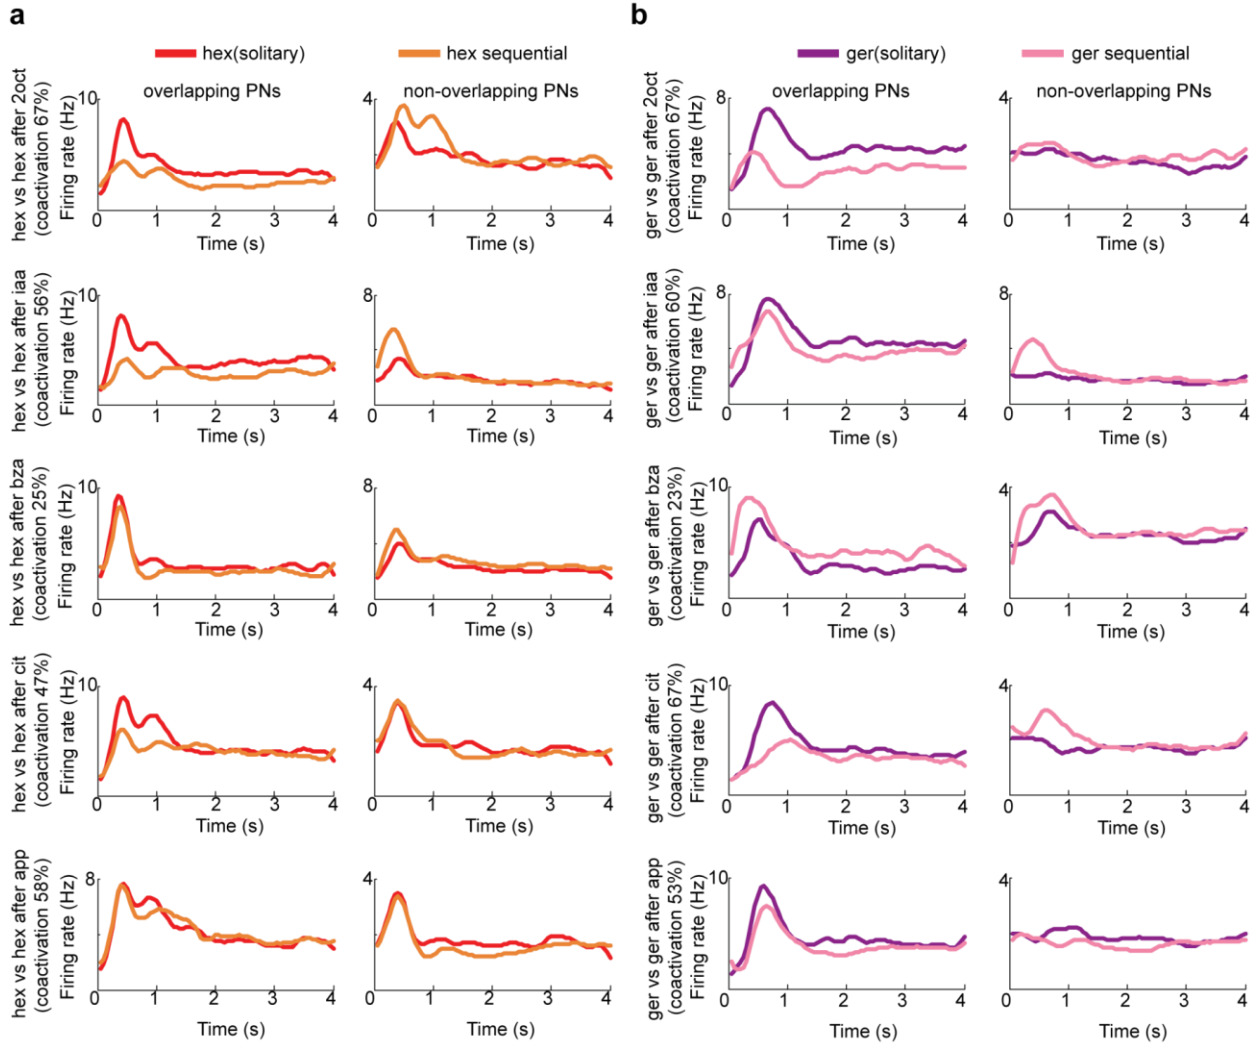

Supplementary Figure 2

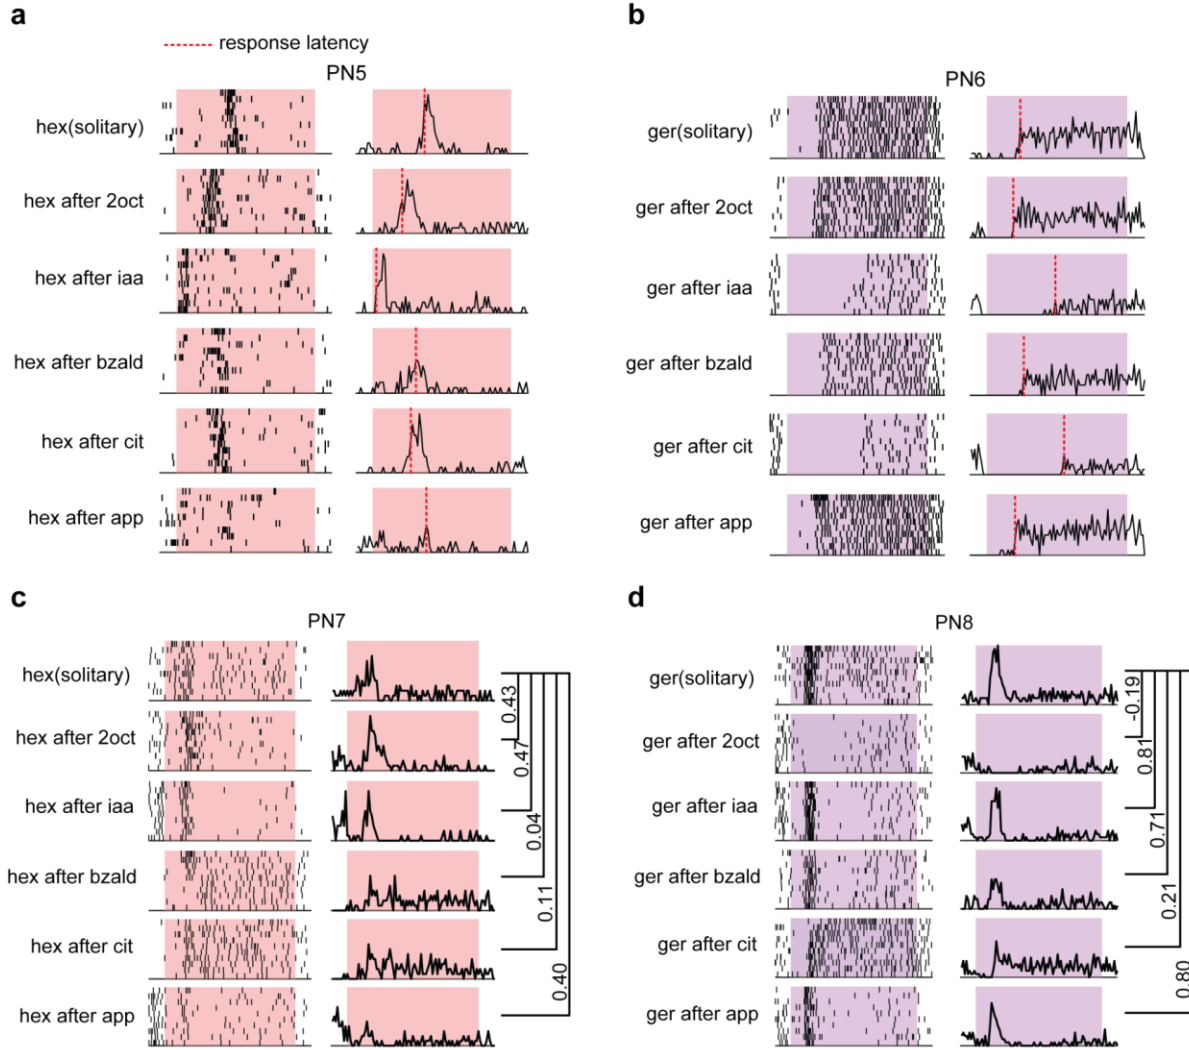

Supplementary Figure 3

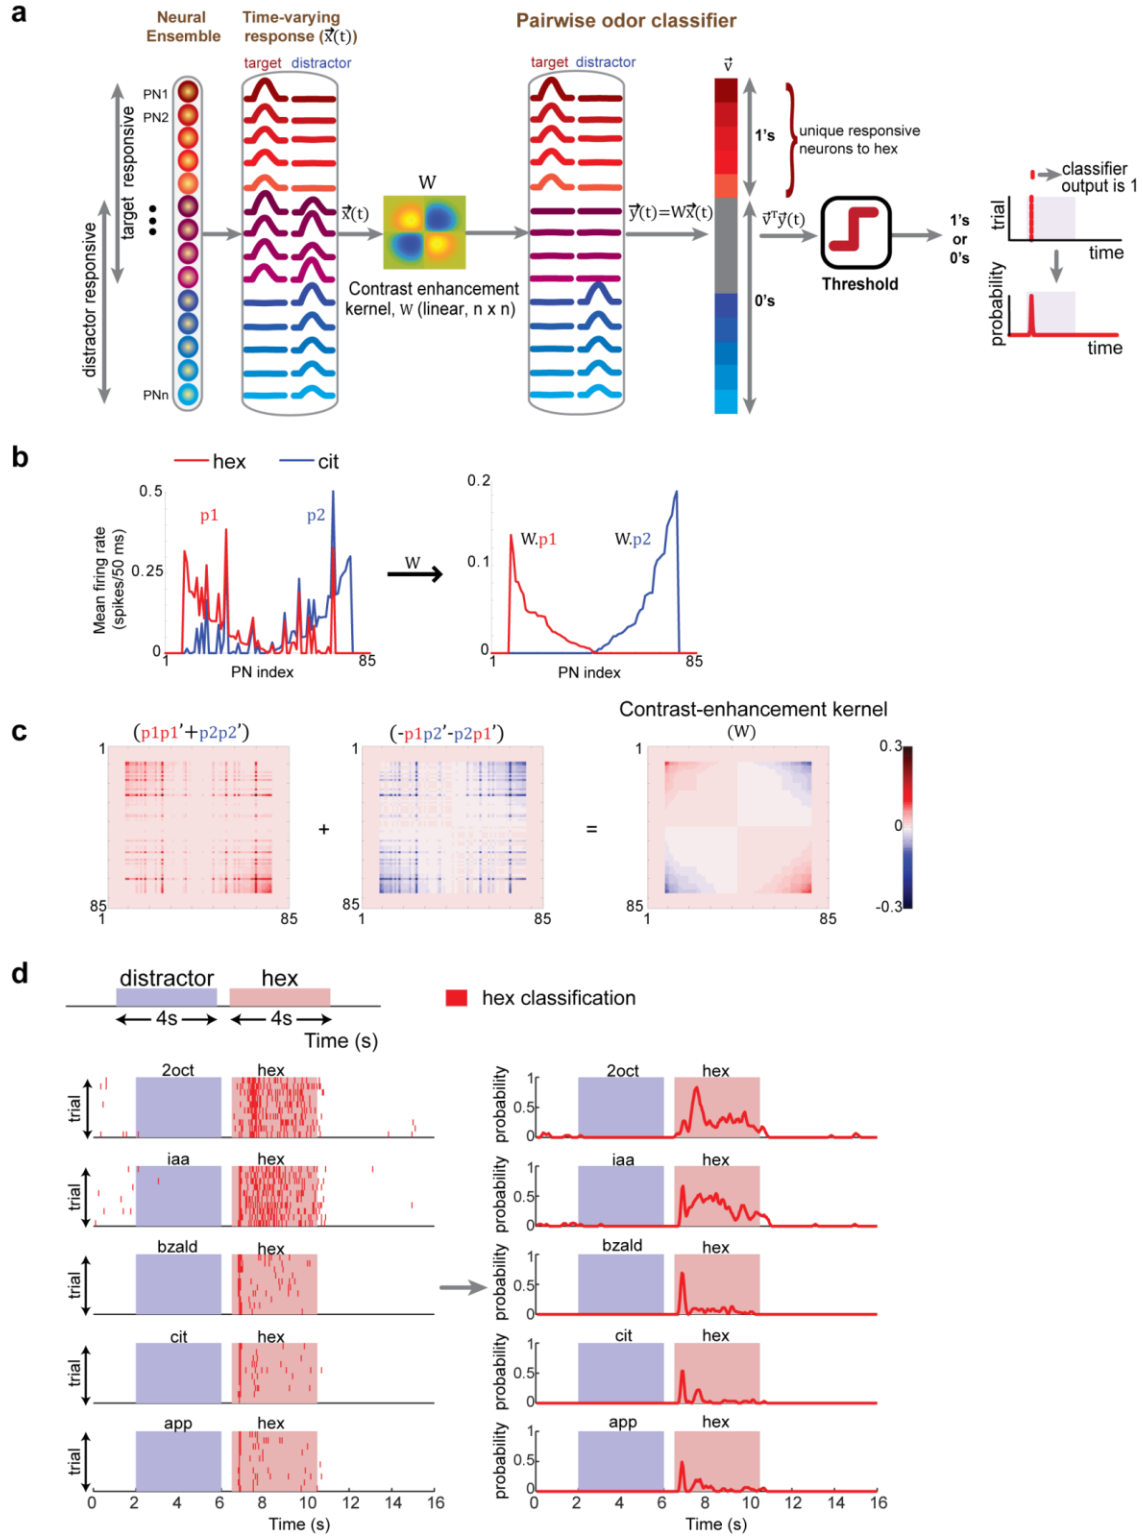

Supplementary Figure 4



### Digital flexible set classifier

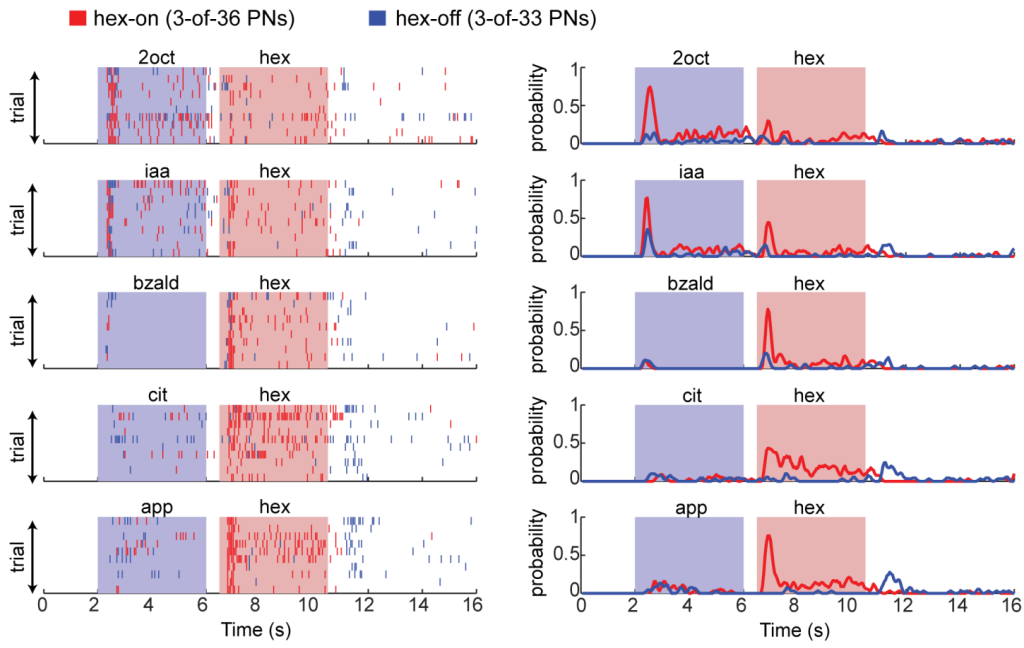

Supplementary Figure 5

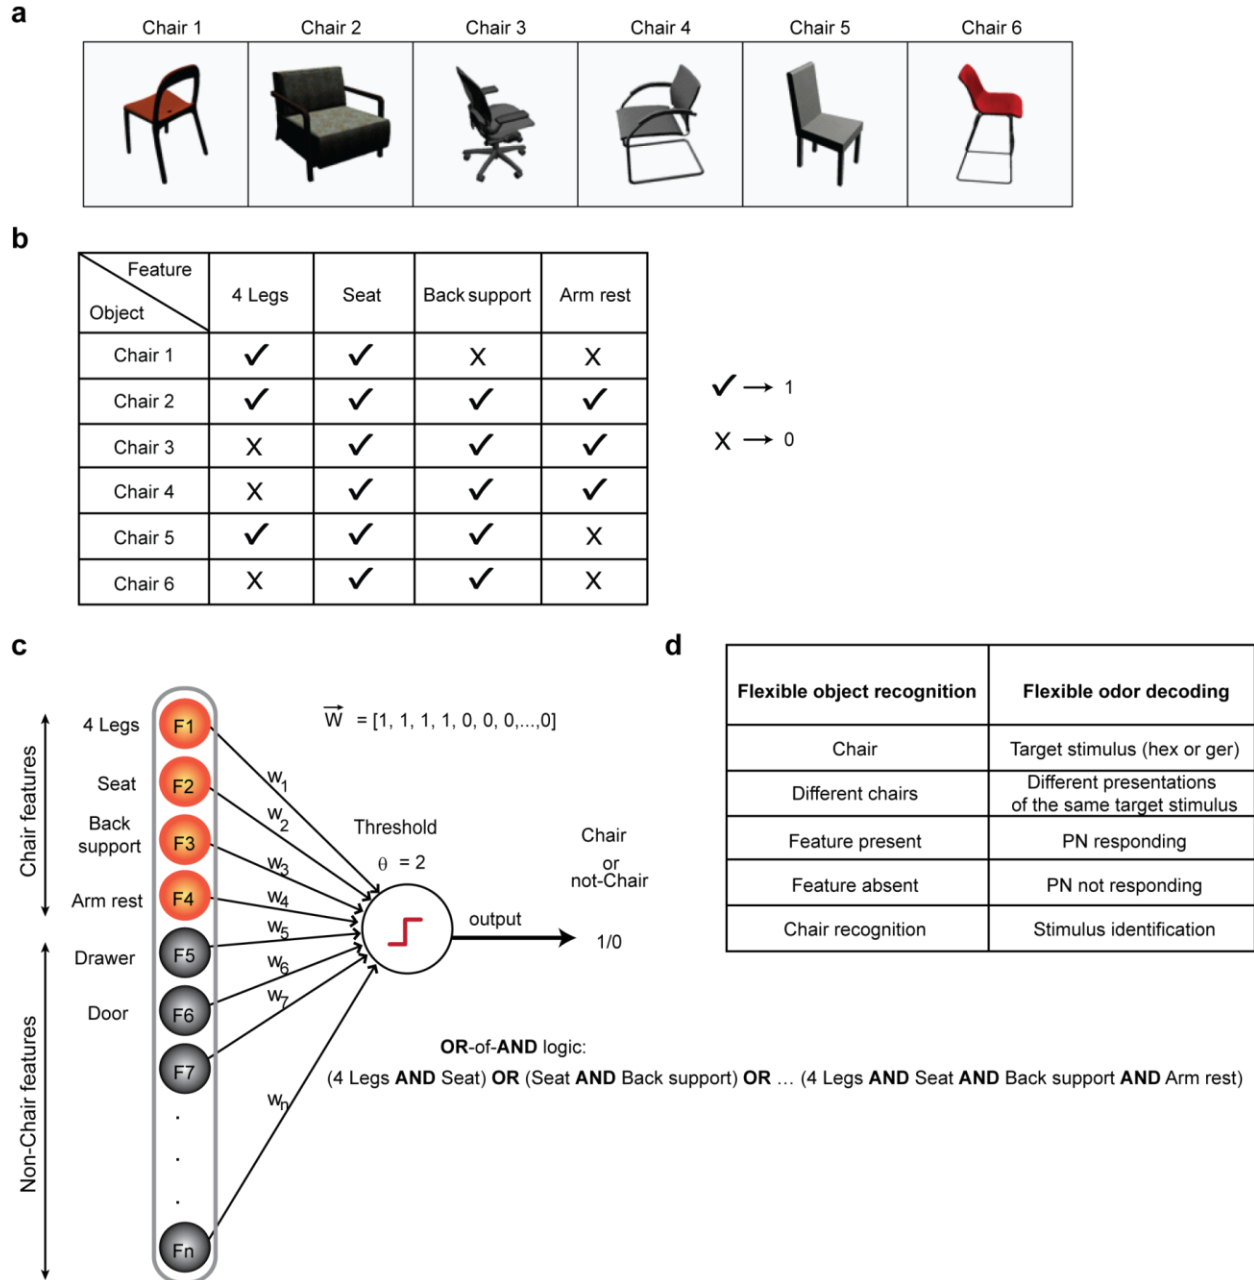

Supplementary Figure 6

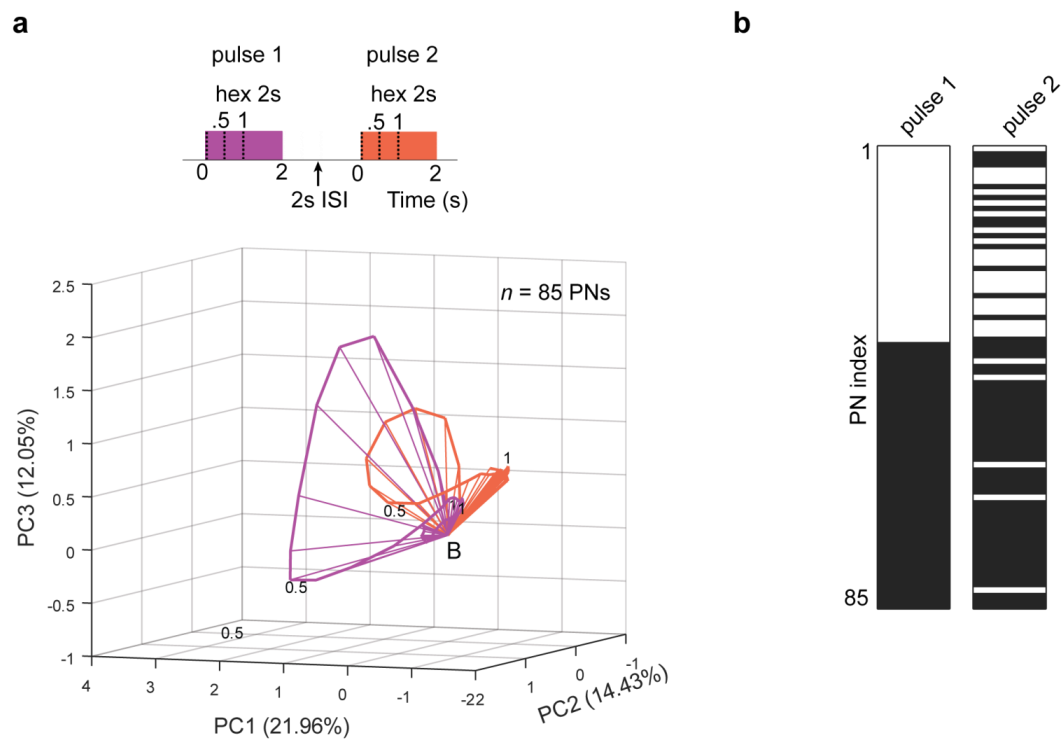

Supplementary Figure 7
